# Supplementary material for: Expanding manganese(iv) aqueous chemistry: unusually stable water-soluble hexahydrazide clathrochelate complexes
Source: Royal Society of Chemistry journal article supplement (doi:10.1039/d1cc04870h), 2021-01-01
Supplement: d1cc04870h1.pdf [file d1cc04870h1.pdf]

## Electronic Supplementary Information

### **Expanding manganese(IV) aqueous chemistry: unusually stable water-soluble hexahydrazide clathrochelate complexes**

Sergii I. Shylin,<sup>a,b</sup> James L. Pogrebetsky,<sup>a</sup> Alina O. Husak,<sup>a,c</sup> Dmytro Bykov,<sup>d</sup> Andriy Mokhir,<sup>e</sup> Frank Hampel,<sup>e</sup> Sergiu Shova,<sup>f</sup> Andrew Ozarowski,<sup>g</sup> Elzbieta Gumienna-Kontecka,<sup>h</sup> and Igor O. Fritsky,<sup>a,c\*</sup>

<sup>a</sup> *Department of Chemistry, Taras Shevchenko National University of Kyiv, 64, Volodymyrska Str., 01601 Kiev, Ukraine*

<sup>b</sup> *Department of Chemistry – Ångström Laboratory, Uppsala University, PO Box 523, 75120 Uppsala, Sweden*

<sup>c</sup> *PBMR Labs Ukraine, Murmanska 1, 02094 Kiev, Ukraine*

<sup>d</sup> *National Center for Computational Sciences, Oak Ridge National Laboratory, Oak Ridge, TN 37831, USA*

<sup>e</sup> *Department of Chemistry and Pharmacy, Friedrich-Alexander-University Erlangen-Nürnberg, Nikolaus-Fiebiger-Str. 10, 91058 Erlangen, Germany*

<sup>f</sup> *”Poni Petru” Institute of Macromolecular Chemistry, Aleea Gr. Ghica Voda 41A, 700487 Iasi, Romania*

<sup>g</sup> *National High Magnetic Field Laboratory, Florida State University, Tallahassee, Florida 32310, USA*

<sup>h</sup> *Faculty of Chemistry, University of Wrocław, F. Joliot-Curie Str. 14, 50-383 Wrocław, Poland*

## Table of Contents

|                                                                          |     |
|--------------------------------------------------------------------------|-----|
| Methods.....                                                             | S3  |
| Figure S1: UV-Vis spectroscopy.....                                      | S6  |
| Figure S2: Complex stability.....                                        | S7  |
| Figure S3: Asymmetric unit for <b>1</b> .....                            | S8  |
| Figure S4: Asymmetric unit for <b>2</b> .....                            | S9  |
| Figure S5: Crystal packing for <b>1</b> .....                            | S10 |
| Figure S6: Crystal packing for <b>2</b> .....                            | S11 |
| Figure S7: Sodium cations coordination.....                              | S12 |
| Figure S8: Magnetic properties.....                                      | S13 |
| Figure S9: DFT calculations.....                                         | S14 |
| Figure S10: CV in acetonitrile, Mn <sup>+5</sup> /Mn <sup>+4</sup> ..... | S15 |
| Figure S11: CV in acetonitrile, full scan.....                           | S16 |
| Figure S12: CV in water, full scan.....                                  | S17 |
| Figure S13: CV in water, Mn <sup>+4</sup> /Mn <sup>+3</sup> .....        | S18 |
| Figure S14: CV in water, Mn <sup>+5</sup> /Mn <sup>+4</sup> .....        | S19 |
| Figure S15: Mass spectrometry.....                                       | S20 |
| Figure S16: IR spectroscopy.....                                         | S21 |
| Supplementary tables.....                                                | S22 |
| References.....                                                          | S39 |

## Methods

**Materials.** All the reagents and solvents used in this work were purchased from commercial sources and were used as received without further purification. Oxalodihydrazide (**oxh**) (99.99% Enamine Ltd.) was used without further purification.

**Synthesis of  $(\text{Ph}_4\text{As})_2[\text{Mn}(\text{L-6H})]\cdot 13.5\text{H}_2\text{O}$  (1).**  $\text{MnCl}_2\cdot 4\text{H}_2\text{O}$  (0.0198 g, 0.1 mmol) was dissolved in 10 ml of water and aqueous ammonia (28%, 0.2 ml, 1.96 mmol) was added to the solution obtained. The precipitate formed was then filtered and washed with water (15 ml) after which it was transferred to the warm ( $\sim 50^\circ\text{C}$ ) solution of **oxh** (0.0354 g, 3 mmol) in 20 ml of water upon stirring. Then excess quantities of aqueous ammonia (28%, 0.52 ml, 5 mmol) and paraform (0.018 g, 6 mmol) were added immediately. The resulting mixture was stained a dark green colour within few minutes. Then the reaction mixture was stirred for 1 hour at  $90^\circ\text{C}$  and tetraphenylarsonium bromide (0.084 g, 0.18 mmol, dissolved in 5 ml of water) was added. The product was extracted by chloroform (2 x 10 ml), and the extract was then dried on a rotary evaporator. The residue was dissolved in a small amount (5 ml) of water and set aside for crystallization at the ambient conditions. Single crystals suitable for X-ray analysis were obtained in 48 h. Yield 0.062 g (42%). Elemental analysis for  $\text{C}_{60}\text{N}_{12}\text{H}_{79}\text{O}_{19.5}\text{MnAs}_2$  (1485.13), calculated, %: C 48.52; H 5.36; N 11.32. Found, %: C 48.72; H 5.32; N 11.15. ESI-HRMS ( $m/z$ , negative mode):  $[\text{M}+\text{H}^+]^-$  calcd for  $\text{C}_{12}\text{H}_{13}\text{N}_{12}\text{O}_6\text{Mn}$  476.0456. Found: 476.0473 (38%).  $[\text{M}+\text{Ph}_4\text{As}^+]^-$  calcd for  $\text{C}_{36}\text{H}_{32}\text{N}_{12}\text{O}_6\text{MnAs}$ : 858.1159 (Fig. S15). Found: 858.1035 (100%). ESI-HRMS ( $m/z$ , positive mode):  $[\text{Ph}_4\text{As}]^+$  calcd for  $\text{C}_{24}\text{H}_{20}\text{As}$  383.0776. Found: 38.0756 (100%). UV-vis ( $\text{H}_2\text{O}$ ):  $\lambda_{\text{max}}$  ( $\epsilon$ ,  $\text{mol}^{-1} \text{dm}^3 \text{cm}^{-1}$ ): 291 nm (16050), 321 nm (17240), 400 nm (shoulder, 4255), 507 nm (3378), 658 nm (4277). Infrared absorption bands (Fig. S16):  $3416 \text{ cm}^{-1}(\text{s})$  O–H stretch,  $3084 \text{ cm}^{-1}(\text{w})$  C–H stretch,  $3057 \text{ cm}^{-1}(\text{w})$  C–H stretch,  $1641 \text{ cm}^{-1}(\text{vs})$  C=O Amide I,  $1614 \text{ cm}^{-1}(\text{w})$ ,  $1577 \text{ cm}^{-1}(\text{m})$ ,  $1484 \text{ cm}^{-1}(\text{m})$ ,  $1440 \text{ cm}^{-1}(\text{m})$ .

**Synthesis of  $[\text{Na}_2(\text{H}_2\text{O})_3\text{Mn}^{\text{IV}}(\text{L-6H})]_n\cdot 4n\text{H}_2\text{O}$  (2).**  $\text{MnCl}_2\cdot 4\text{H}_2\text{O}$  (0.0198 g, 0.1 mmol) was dissolved in 10 ml of water and added to the warm ( $\sim 50^\circ\text{C}$ ) solution of **oxh** (0.0354 g, 3 mmol) in 20 ml of water upon stirring. Paraform (0.018 g, 6 mmol) was added to tetrabutylammonium hydroxide (40% aqueous solution, 3.26 ml, 5 mmol), and after a few minutes the resulting solution was poured to the solution of **oxh** and manganese(II) chloride upon stirring. The resulting mixture was stained a dark green color within few minutes. After 30 minutes the solution was filtered and the filtrate was dried on a rotary evaporator. The residue was dissolved in acetone (5 ml) and solution of  $\text{NaClO}_4\cdot 2\text{H}_2\text{O}$  (0.0317 g, 0.2 mmol) in 10 ml of acetone was added. The resulting precipitate was filtered, then dissolved in a small amount (5 ml) of water and set aside for crystallization at the ambient conditions. Single crystals suitable for X-ray analysis were obtained in 48 h. Yield 0.041 g (63%). Elemental analysis for  $\text{C}_{12}\text{H}_{26}\text{MnN}_{12}\text{Na}_2\text{O}_{13}$  (647.37): calculated, %: C, 22.27; H, 4.05; N, 25.97. Found, %: C, 22.03; H, 4.18; N, 25.79. UV-vis ( $\text{H}_2\text{O}$ ):  $\lambda_{\text{max}}$  ( $\epsilon$ ,  $\text{mol}^{-1} \text{dm}^3 \text{cm}^{-1}$ ): 291 nm (14370), 321 nm (15160), 400 nm (shoulder, 3740), 507 nm (2960), 658 nm (3720). Infrared absorption bands (Fig. S16):  $3429 \text{ cm}^{-1}(\text{s})$  O–H stretch,  $2948 \text{ cm}^{-1}(\text{w})$  C–H stretch,  $2863 \text{ cm}^{-1}(\text{w})$  C–H stretch,  $1646 \text{ cm}^{-1}(\text{vs})$  C=O Amide I.

**Single crystal X-ray Crystallographic analyses.** Measurements for **1** were carried out on an Oxford-Diffraction XCALIBUR E CCD diffractometer at 160(2) K with horizontally mounted graphite crystal as a monochromator and Mo- $K_\alpha$  radiation ( $\lambda = 0.71073 \text{ \AA}$ ) using the  $\omega$ -scan technique.

Intensity data for **2** was obtained at 173(2) K on an Agilent SuperNova diffractometer with Atlas detector and Cu-K $\alpha$  radiation ( $\lambda = 1.54184 \text{ \AA}$ ). Data was collected and processed using CrysAlisPro package of Oxford Diffraction.<sup>1</sup> An empirical absorption correction (multi-scan) was applied to all data (*CrysAlis PRO*).<sup>1</sup>

The unit cell determination and data integration were carried out using the CrysAlis package of Oxford Diffraction (*CrysAlis PRO*).<sup>1</sup> The structures were solved by direct methods using Olex2 software<sup>2</sup> with the SHELXT structure solution program<sup>3</sup> and refined by full-matrix least-squares on all  $F_o$ .<sup>2</sup> using *SHELXL2018/1* anisotropically for all non-hydrogen atoms. The C-H hydrogen atoms were placed in fixed, idealized positions ( $d_{\text{C-H}} = 0.96 \text{ \AA}$ ) and refined as those riding to the corresponding non-hydrogen atoms. The O-H hydrogen atoms were located from the difference Fourier map and verified by corresponding H-bonds parameters.

**Elemental analysis.** Elemental analysis was conducted by the Microanalytical Service of the University of Kyiv using a Vario Micro Cube (Elementar) elemental analyzer.

**Mass-spectrometry measurements.** High resolution electrospray mass spectra (ESI-HRMS) were collected on a Finnigan TSQ 700 mass spectrometer. Complexes were dissolved in water or in water-methanol (1:9) mixture to obtain solutions with concentrations of  $10^{-4}$ - $10^{-6}$  M.

**Infrared vibrational spectroscopic measurements.** IR spectra were recorded on a Perkin-Elmer 180 spectrometer in the range of 400-4000  $\text{cm}^{-1}$ . Solid samples of the compounds were homogenized with excess amounts of KBr and a pressed pellet was measured at room temperature.

**Electronic absorption (UV-VIS) spectroscopic measurements.** Electronic absorption spectra were recorded on a Varian Cary 50 spectrophotometer in the range from 200 nm to 800 nm in the indicated solvent at room temperature.

**Magnetochemical study.** Temperature-dependent magnetic susceptibility measurements were carried out with a Quantum-Design MPMS-XL-5 SQUID magnetometer equipped with a 5 T magnet in a temperature range of 1.85 – 300K. The powdered samples were contained in a gel bucket and fixed in a nonmagnetic sample holder. Diamagnetic corrections of the constituent atoms for **1** were obtained with the use of Pascal's constants and found to be  $-857.0 \times 10^{-6} \text{ cm}^3 \text{ mol}^{-1}$ . Experimental susceptibilities were also corrected for the magnetization of the sample holder ( $0.0001 \text{ cm}^3 \text{ mol}^{-1}$ ).

**EPR spectroscopy.** High-field, high-frequency EPR spectra at temperatures ranging from ca. 3 K to 290 K were recorded on a home-built spectrometer at the EMR facility of the NHMFL.<sup>4</sup> The instrument is equipped with a superconducting magnet (Oxford Instruments) capable of reaching a field of 17 T. Microwave frequencies over the range of 52-416 GHz were generated by a phase-locked Virginia Diodes source, producing a base frequency of 8-20 GHz, which was multiplied by a cascade of frequency multipliers. The instrument is a transmission-type device and uses no resonance cavity.

**Electrochemical Measurements.** All electrochemical measurements (cyclic voltammetry) were performed under a dry nitrogen atmosphere at  $25 \pm 1^\circ\text{C}$  using  $10^{-3}$  M solutions either in water or acetonitrile with 1 M supporting electrolyte. The potential was scanned with different sweep rates ranging from 10 to 1000  $\text{mV s}^{-1}$  and a conventional three electrode cell with a Metrohm 6.1204.120

Platinum Unpolished Rotating Disk Electrode as a working electrode, a Metrohm 6.0343.000 platinum auxiliary electrode and a Metrohm 6.0728.020 Ag/AgCl reference electrode on a Metrohm 757 VA Computrace instrument. All the reported half-wave potentials in acetonitrile were referenced against the ferrocenium/ferrocene (Fc/Fc<sup>+</sup>) redox couple as internal standard (10 mM ferrocene solution).

**DFT calculations.** DFT calculations were conducted using ORCA package.<sup>5</sup> Starting geometries were derived from crystallographic studies and optimized using BP86 functional and def2-TZVP basis set.<sup>6</sup> The model consists of 43 atoms and 1047 basis functions. Enlarged DFT numerical integration grid was used in these calculations together with tight convergence threshold for the self-consistent-field procedure (Grid 6 and TightSCF in ORCA notation). The resolution of the identity approximation was invoked as well as Grimmes semi-empirical dispersion correction.<sup>7</sup> The optimized structures were verified by calculating molecular Hessian.<sup>8</sup> The single point calculations on the optimized structures were using B3LYP functional.<sup>9</sup> The solvent effects were included with CPCM.<sup>10</sup> Electronic g-tensor calculations were done at the same level of theory using procedure outlined by Neese.<sup>11</sup> Orbitals, densities and structures were visualized with the Chimera program.<sup>12</sup>

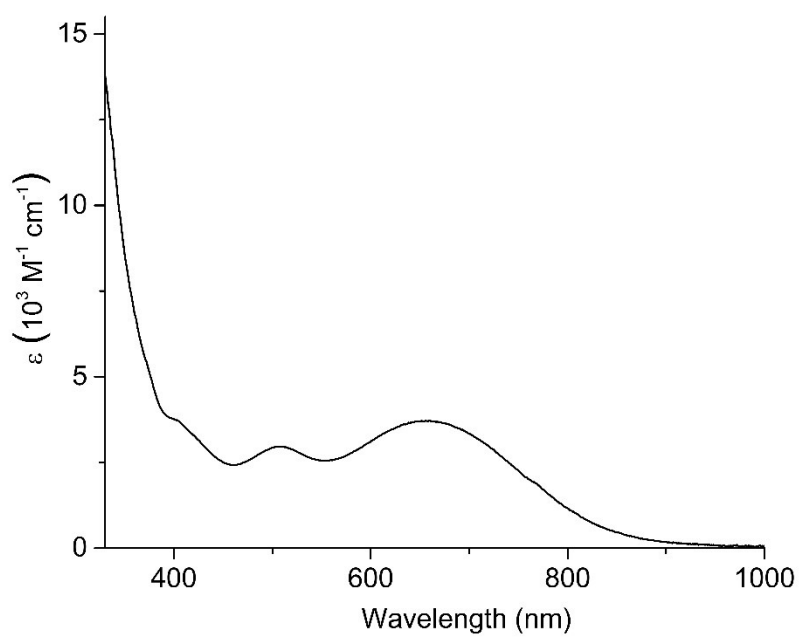

**Figure S1.** Electronic absorption spectrum of **1** (aqueous solution,  $10^{-4}$  M).

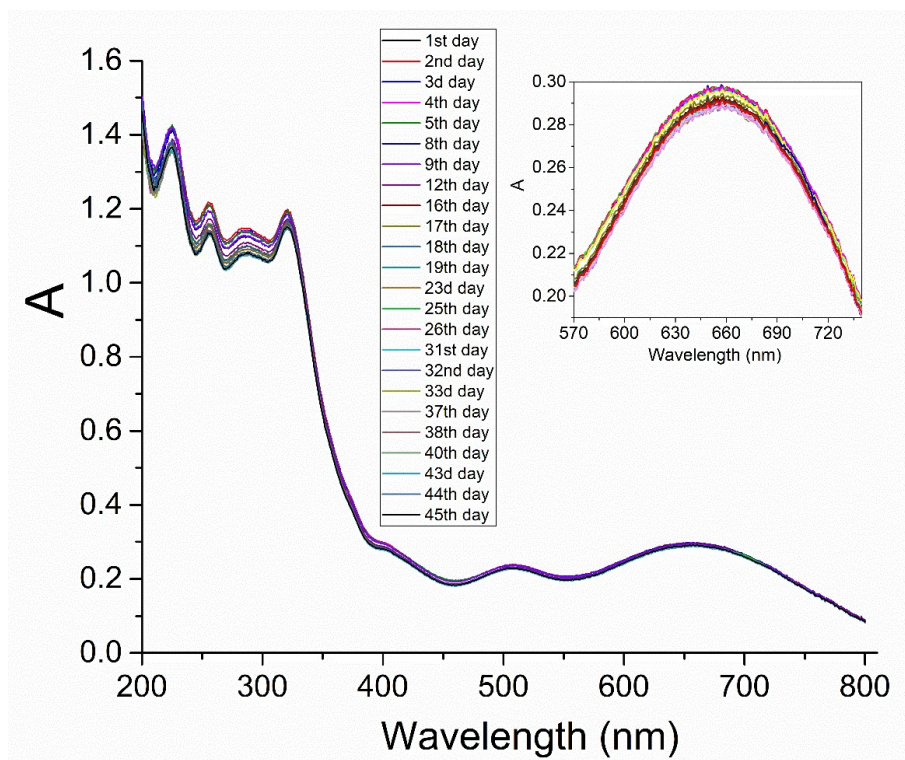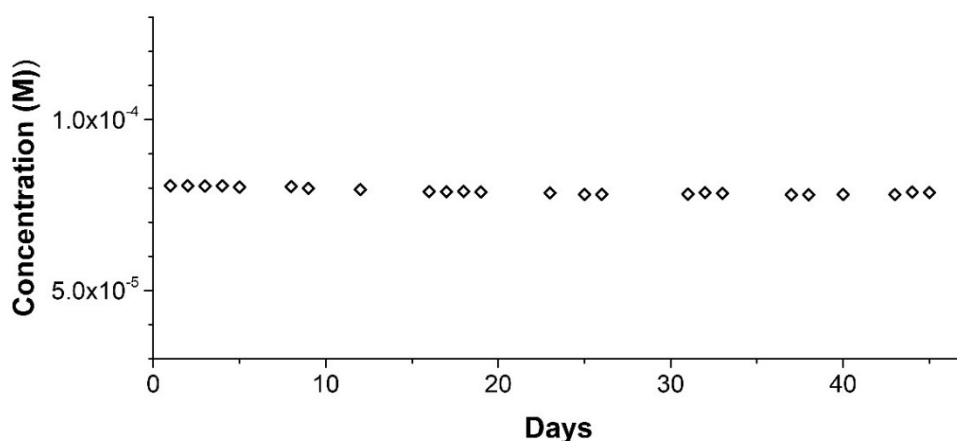

**Figure S2:** Top: changes in electronic absorption spectra of aqueous solution of **1** ( $0.8 \cdot 10^{-4} \text{ M}$ ) with time. Experiment took place for 45 days at  $20^\circ \text{C}$ . Inset: spectral changes around absorption maximum at 658 nm. (b) Bottom: changes in concentration of **1** in aqueous solution with time. The concentration of the initial solutions after 45 days has dropped by ca. 3.5%.

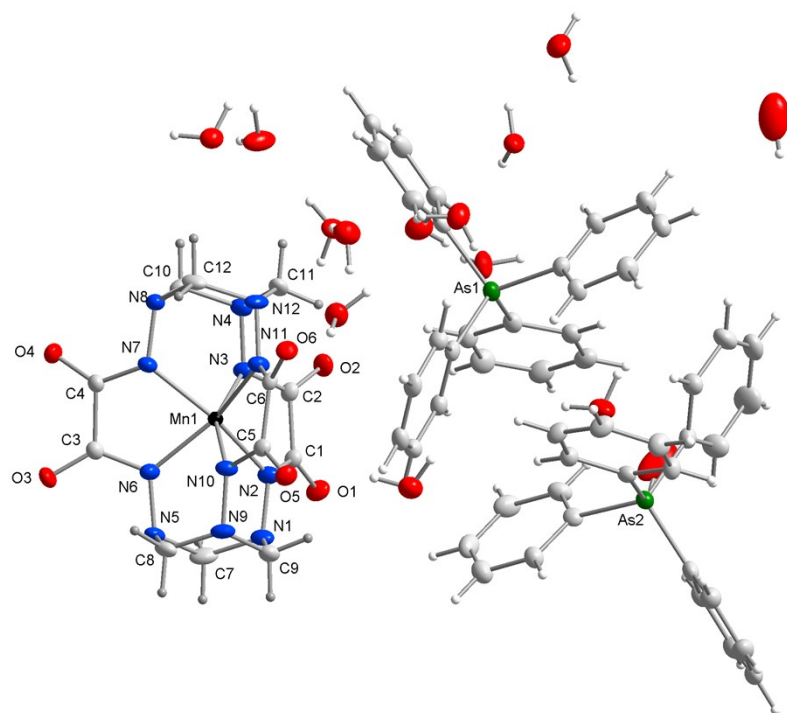

**Figure S3.** View of the asymmetric part of  $(\text{Ph}_4\text{As})_2[\text{Mn}(\text{L-6H})]\cdot 13.5\text{H}_2\text{O}$  (**1**) showing the atom numbering scheme.



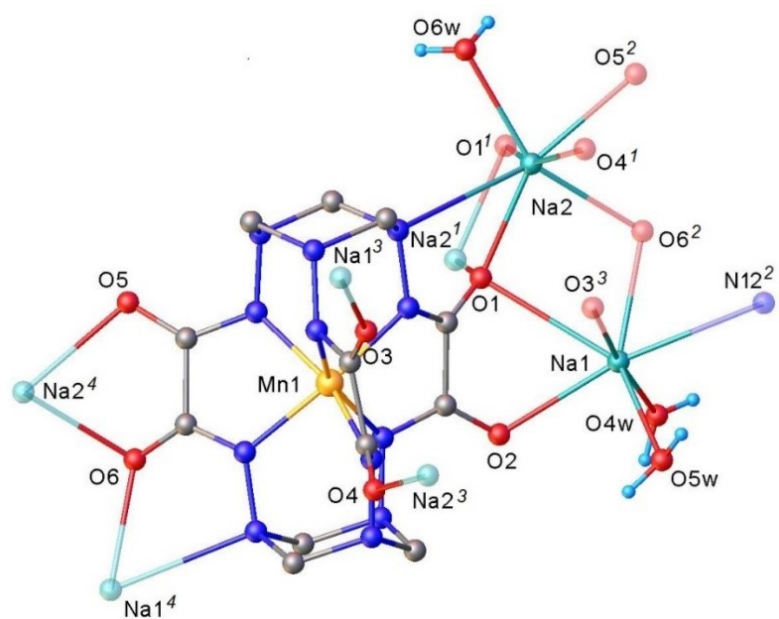

**Figure S4.** View of the asymmetric part of  $[\text{Na}_2(\text{H}_2\text{O})_3\text{Mn}^{\text{IV}}(\text{L-6H})]_n \cdot 4n\text{H}_2\text{O}$  (**2**) showing the atom numbering scheme.

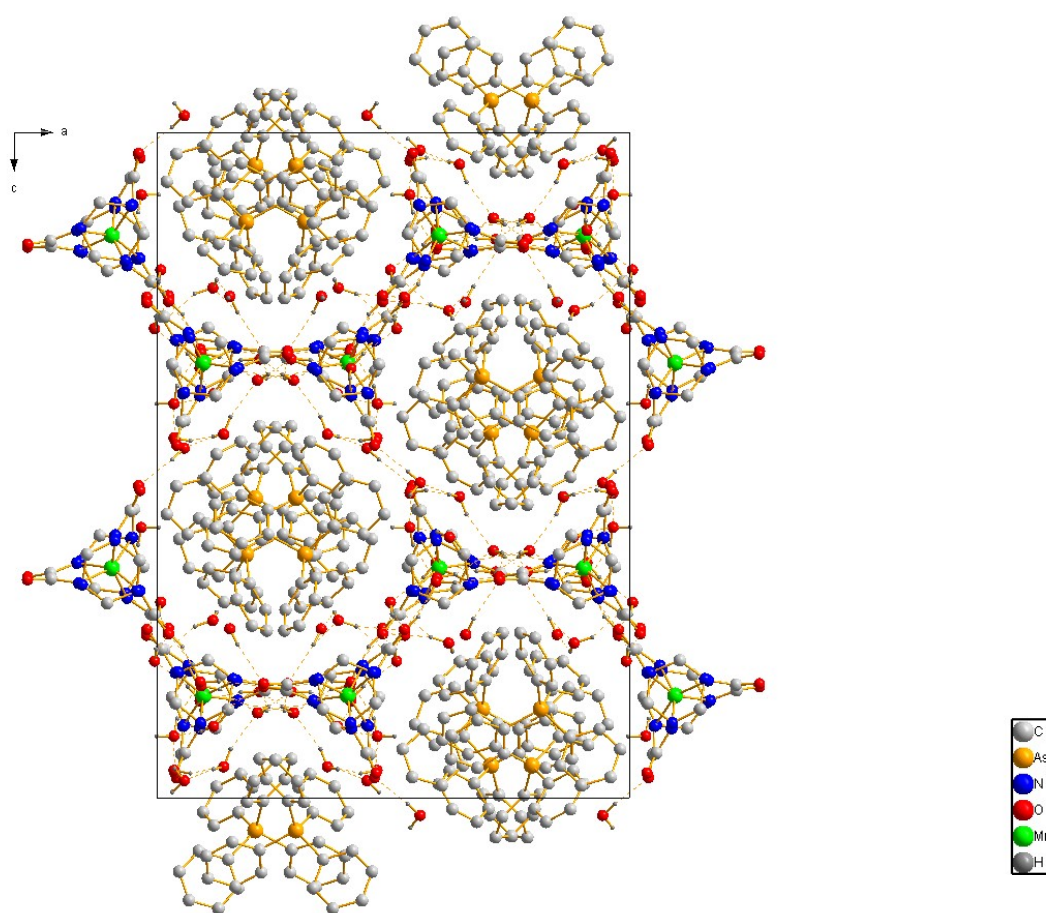

**Figure S5.** Packing diagram for  $(\text{Ph}_4\text{As})_2[\text{Mn}(\text{L-6H})]\cdot 13.5\text{H}_2\text{O}$  (**1**) (viewed parallel to the  $ac$  plane). Hydrogen bonds are indicated as dashed lines. C-H hydrogen atoms omitted for clarity. The complex anions united by H-bonds with the help of solvate water molecules form hollow honeycomb-like channels disposed along  $b$  direction of the crystal. These empty channels are filled with columns formed by  $\text{Ph}_4\text{As}^+$  cations associated between each other due to stacking and van der Waals interactions.

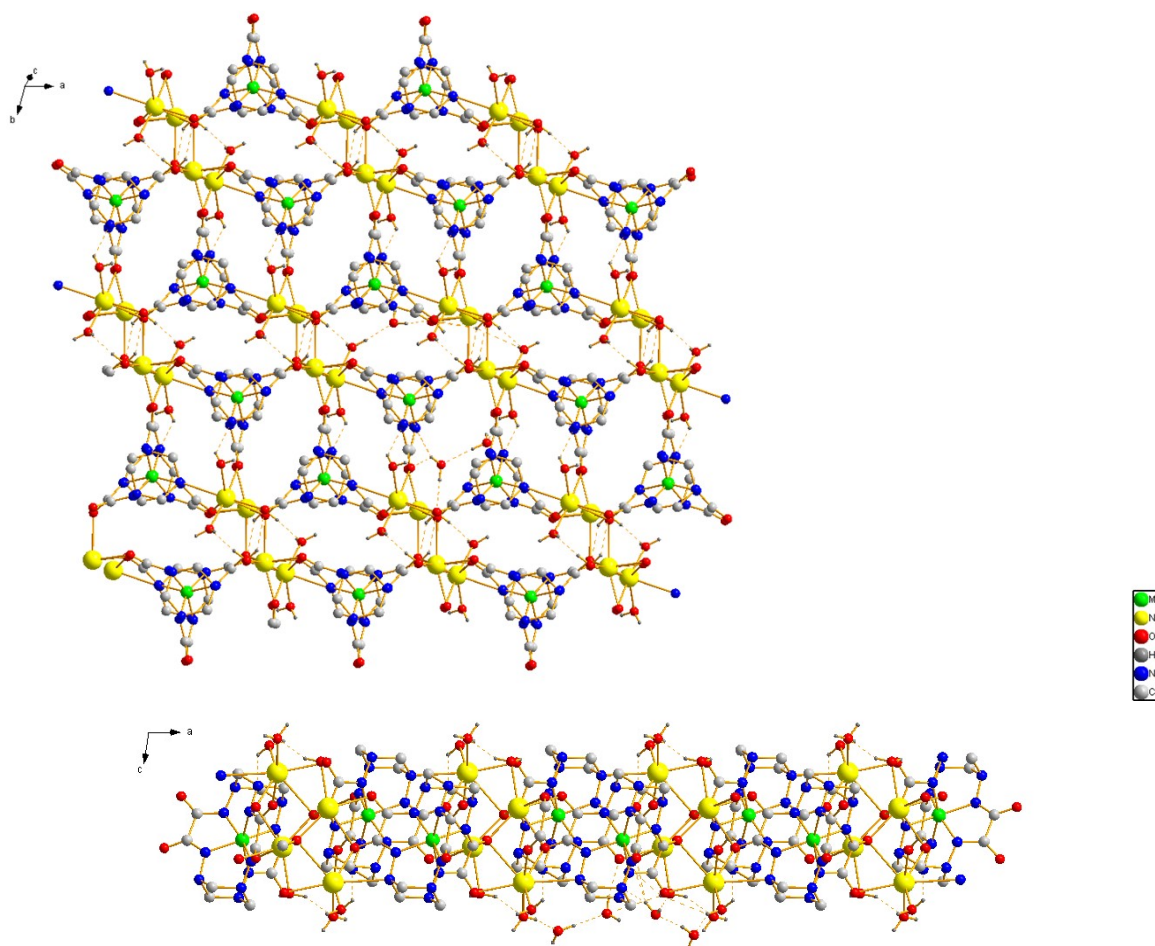

**Figure S6.** Packing diagrams of  $[\text{Na}_2(\text{H}_2\text{O})_3\text{Mn}^{\text{IV}}(\text{L}-6\text{H})]_n \cdot 4n\text{H}_2\text{O}$  (**2**) demonstrating association of sodium cations with cage anions and organization of them into layers of two-dimensional coordination network. Top: a view perpendicular to the “crown” of the cage anions. Bottom: a view parallel to the  $ac$  plane.

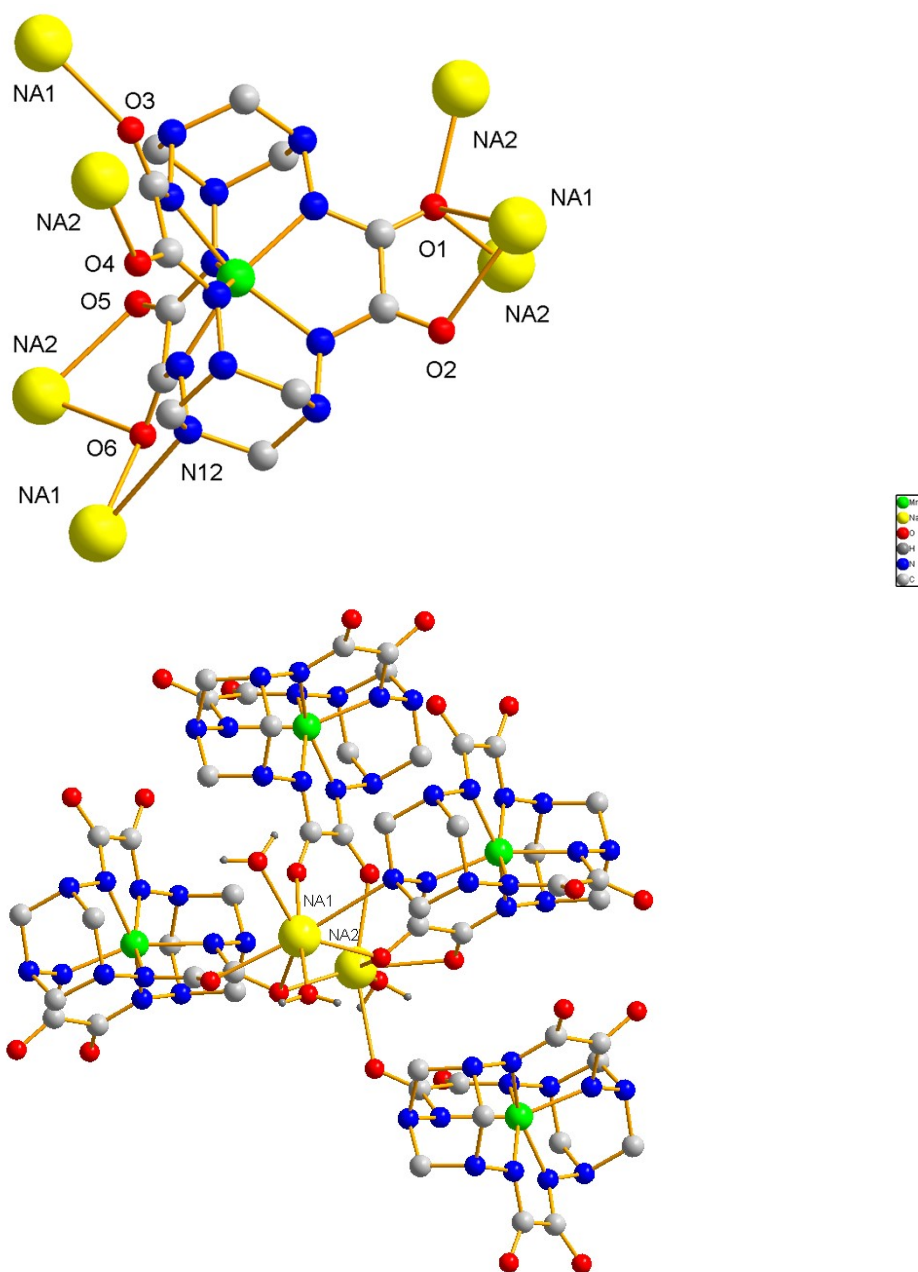

**Figure S7.** Coordination of sodium cations in  $[\text{Na}_2(\text{H}_2\text{O})_3\text{Mn}^{\text{IV}}(\text{L-6H})]_n \cdot 4n\text{H}_2\text{O}$  (**2**). Top: association of seven (two basic and five translational) sodium cations around the complex anion. Bottom: a diagram demonstrating the completed coordination spheres of sodium cations Na1 and Na2 and their association with four neighboring clathrochelate anions in the crystal packing.

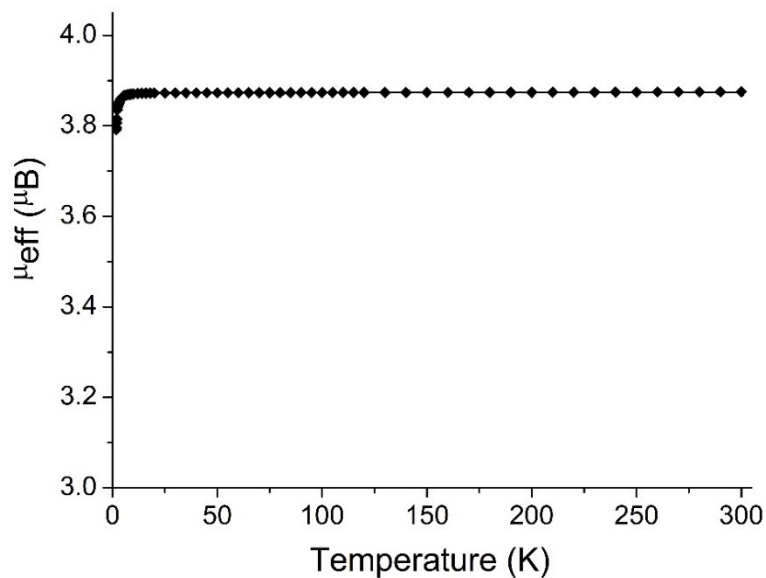

**Figure S8.** Temperature dependence of magnetic moment for the crystalline sample of **1**. The experimental curve (diamonds) can be fitted (solid line) with taking into account Zeeman splitting resulting in  $g = 2.000$ , and the observed drop of magnetic moment below 5 K is due to magnetization saturation at 0.5 T. Attempts to introduce D and E parameters into model did not give any improvement of the fit and did not result in obtaining of stable meaningful values of these parameters. Thus, introduction into the model D and E/D parameters obtained from high-field EPR ( $0.28 \text{ cm}^{-1}$  and  $0.1$ , respectively) resulted in close final values ( $0.165 \text{ cm}^{-1}$  and  $0.106$ , respectively, with  $g = 2.001$ ).

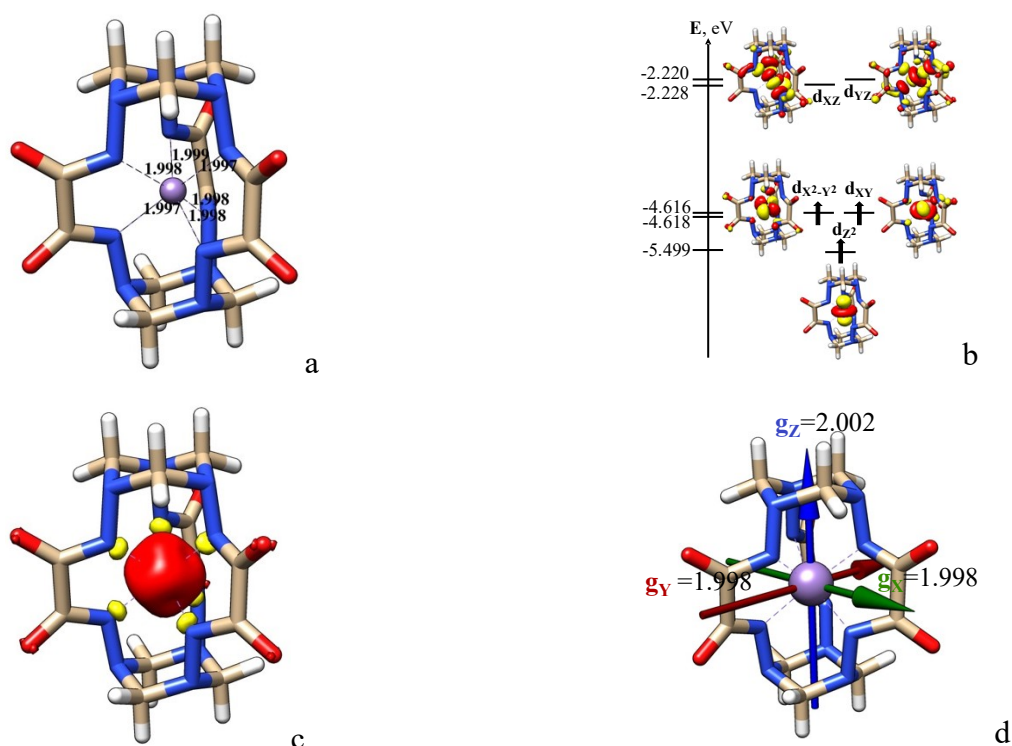

**Figure S9.** DFT electronic structure calculations of the clathrochelate anion in **1**. (a) Geometrical parameters from BP86/TZVP optimization revealing the quartet ground state of Mn(IV),  $S = 1.5$ . The high-spin state is 30.3 kcal/mol lower in energy than the hypothetical low-spin  $S = 0.5$  Mn(IV) state. (b) The frontier molecular orbitals diagram showing 3 SOMO (singly occupied molecular orbital) metal-based orbitals and two unoccupied LUMO orbitals. The lowest lying molecular orbital is of  $d_{z^2}$  symmetry and two others almost degenerate SOMO orbitals are  $d_{x^2-y^2}$  and  $d_{xy}$ . All SOMO orbitals are essentially nonbonding in their character and almost entirely metal-based. The LUMOs are strongly antibonding molecular orbitals. (c) Spin density. (d) Electronic g-tensor orientation. Atom coordinates for the optimized structure of **1** are given in Table S8.

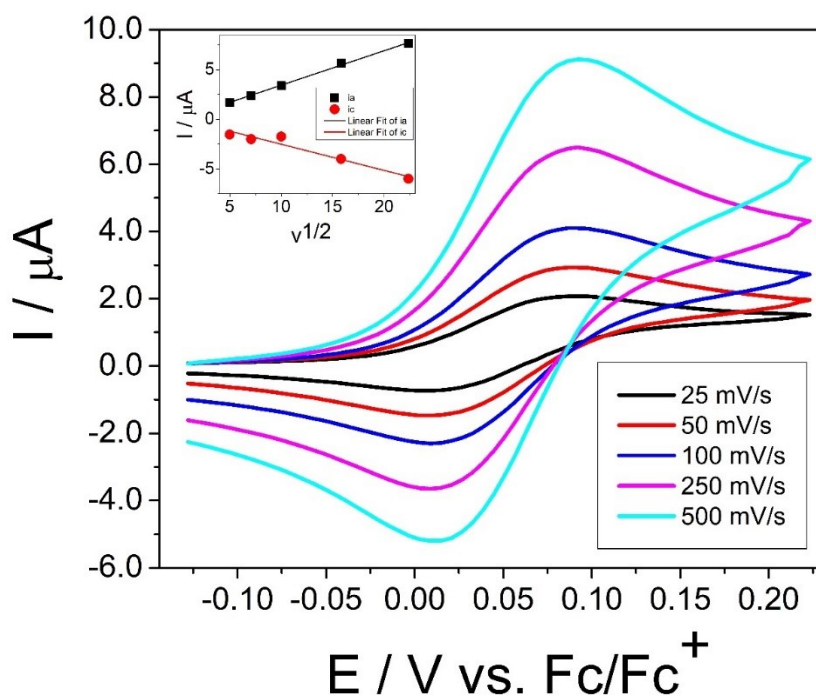

**Figure S10.** Cyclic voltammograms of **1** (1 mM) as a function of scan rate, recorded in acetonitrile solution showing the  $\text{Mn}^{5+}/\text{Mn}^{4+}$  redox couple. Scan rates (in  $\text{mV s}^{-1}$ ): black – 25; red – 50; blue – 100; magenta – 250; cyan – 500. Inset: a plot of  $i_{p,c}$  (red) and  $i_{p,a}$  (black) as a function of the square root of the scan rate  $v^{1/2}$ , showing the linear relationship.

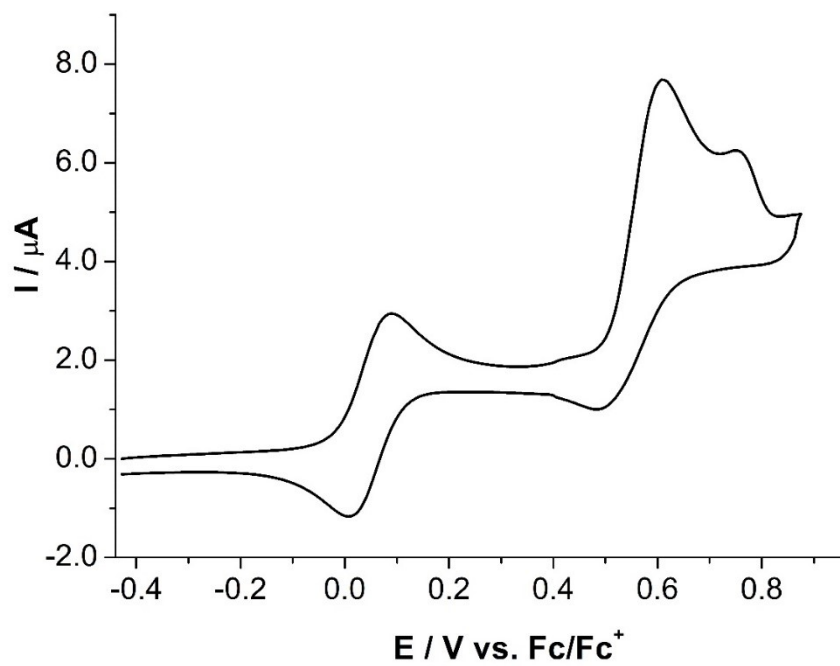

**Figure S11.** Cyclic voltammogram of **1** in acetonitrile solution (1 mM) at 50 mV s<sup>-1</sup> scan rate.



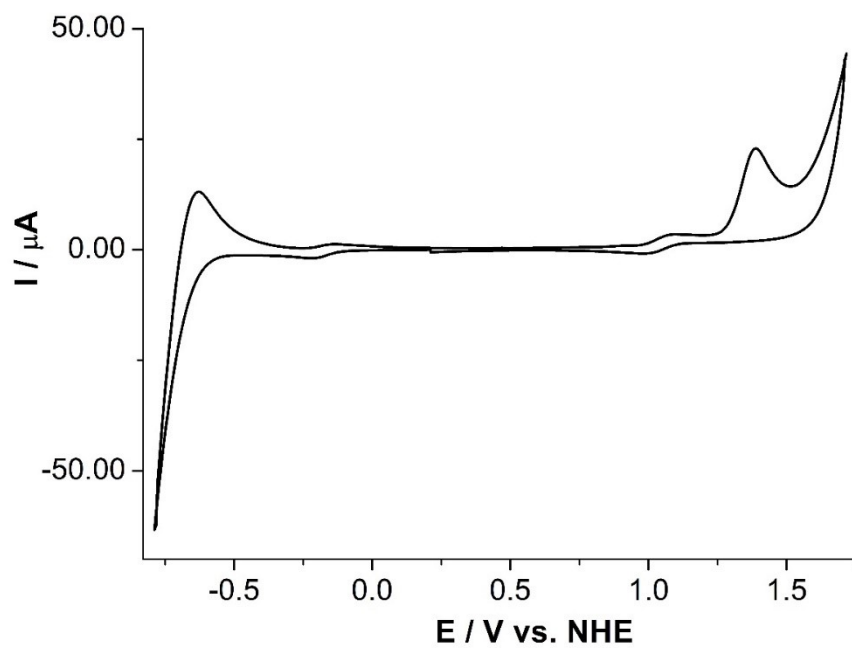

**Figure S12.** Cyclic voltammogram of **1** in aqueous solution (1 mM) at a scan rate of 10 mV s<sup>-1</sup>.

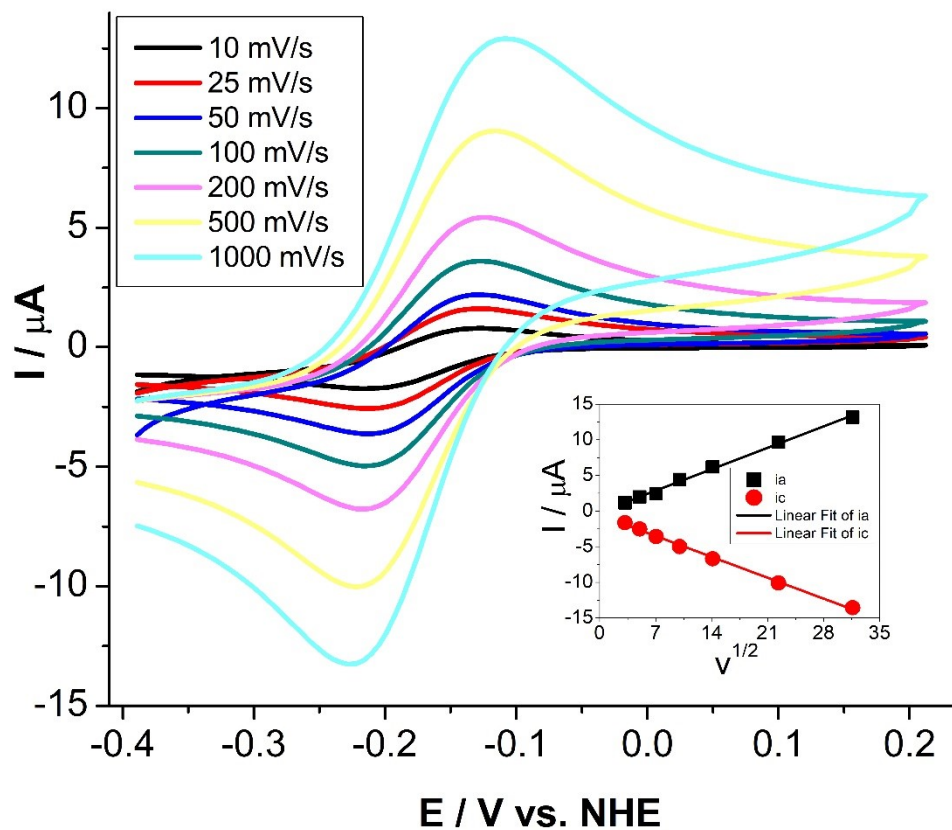

**Figure S13.** Cyclic voltammograms of **1** (1 mM) as a function of scan rate, recorded with NaClO<sub>4</sub> (1 M) as supporting electrolyte in aqueous solution, showing the Mn<sup>4+</sup>/Mn<sup>3+</sup> redox couple. Scan rates (in mV s<sup>-1</sup>): black – 10; red – 25; blue – 50; dark cyan – 100; magenta – 250; yellow – 500; cyan – 1000. Inset: a plot of  $i_{p,c}$  (red) and  $i_{p,a}$  (black) as a function of the square root of the scan rate  $v^{1/2}$ , showing the linear relationship.

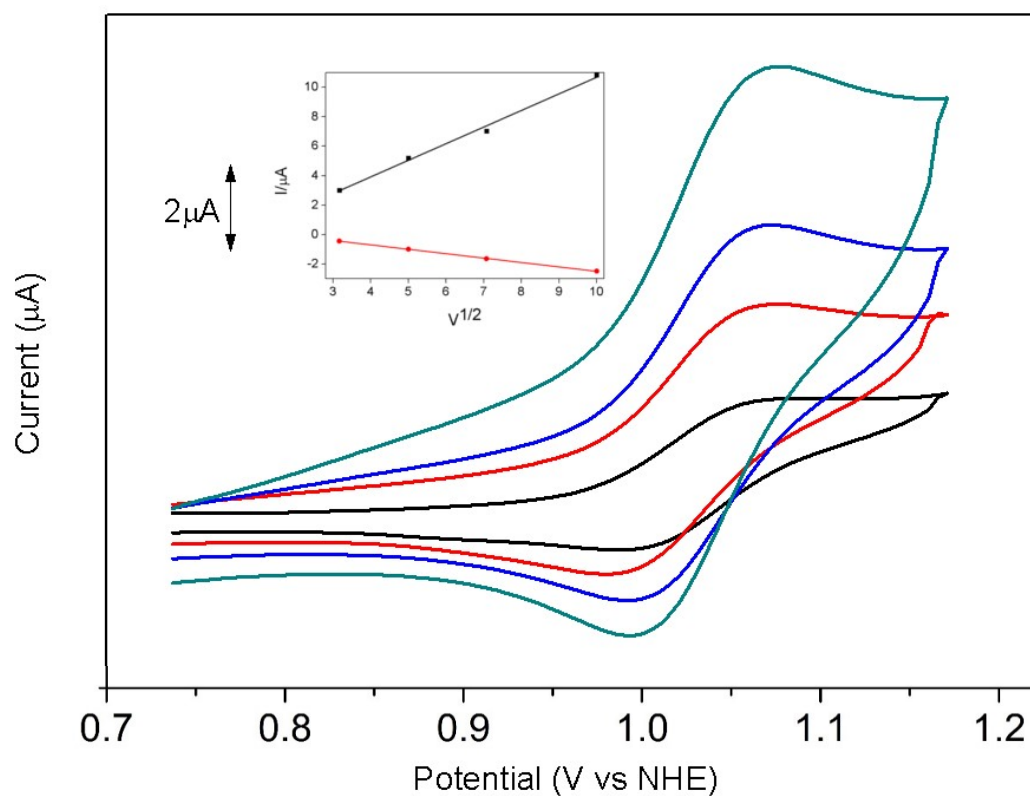

**Figure S14.** Cyclic voltammograms of **1** (1 mM) as a function of scan rate, recorded with  $\text{NaClO}_4$  (1 M) as supporting electrolyte in aqueous solution showing the  $\text{Mn}^{5+}/\text{Mn}^{4+}$  redox couple. Scan rates (in  $\text{mV s}^{-1}$ ): black – 10; red – 25; blue – 50; dark cyan – 100. Inset: a plot of  $i_{p,c}$  (red) and  $i_{p,a}$  (black) as a function of the square root of the scan rate  $v^{1/2}$ , showing the linear relationship.

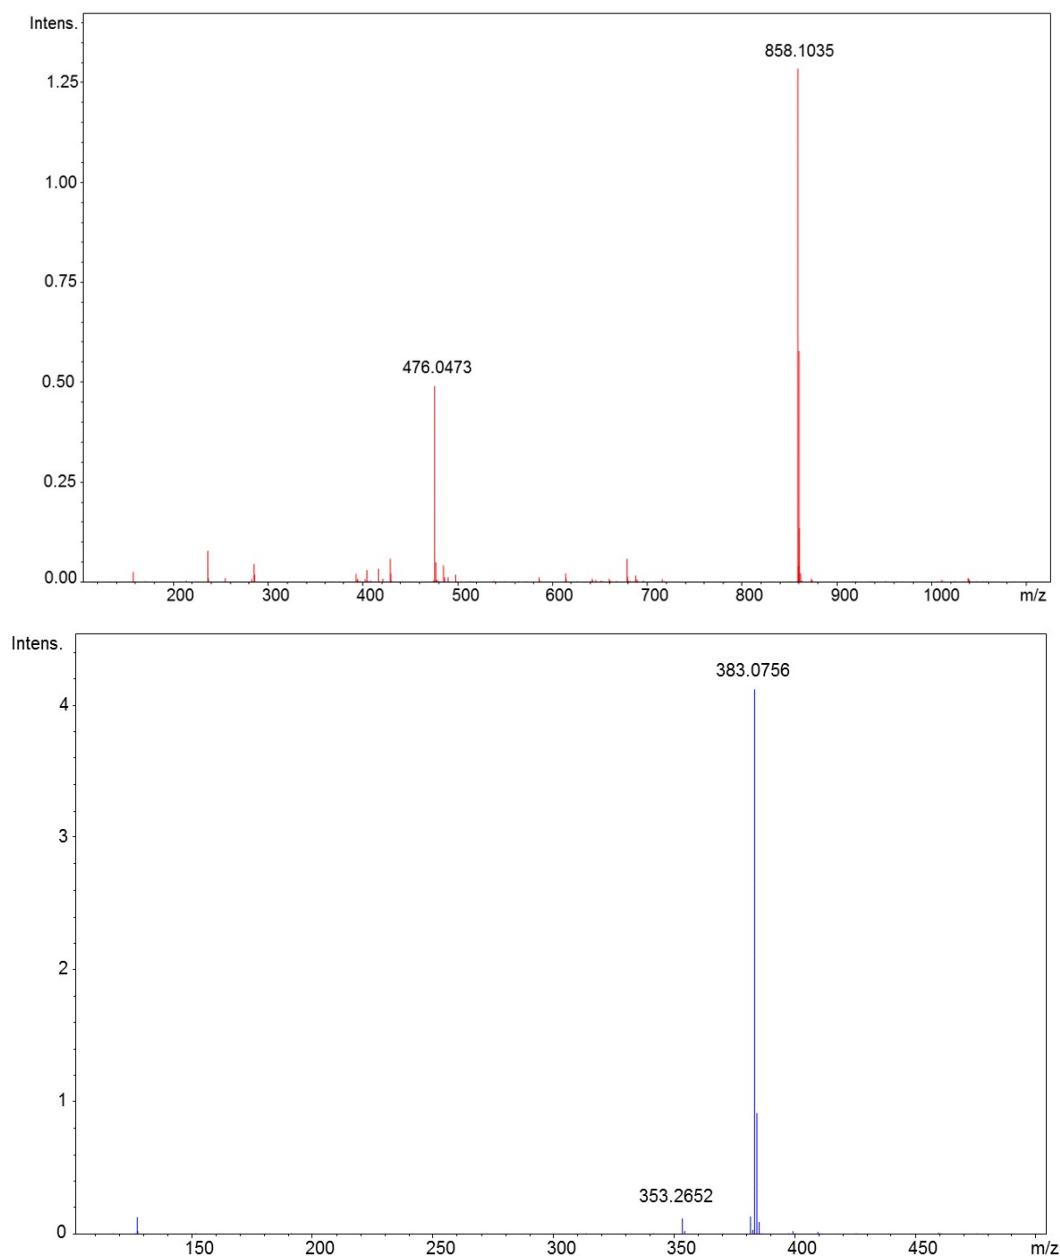

**Figure S15.** ESI-MS spectra of **1** in water-methanol (1:9) mixture recorded in negative (top) and positive (bottom) modes. Features at  $m/z$  of 476.0473 and 858.1035 (negative mode) correspond to  $\{[\text{Mn}^{\text{IV}}\text{C}_{12}\text{N}_{12}\text{O}_6\text{H}_{12}]^{2-} + \text{H}^+\}^-$  and  $\{[\text{Mn}^{\text{IV}}\text{C}_{12}\text{N}_{12}\text{O}_6\text{H}_{12}]^{2-} + (\text{C}_6\text{H}_5)_4\text{As}^+\}^-$ , respectively. A feature at  $m/z$  of 383.0756 (positive mode) corresponds to  $(\text{C}_6\text{H}_5)_4\text{As}^+$ .

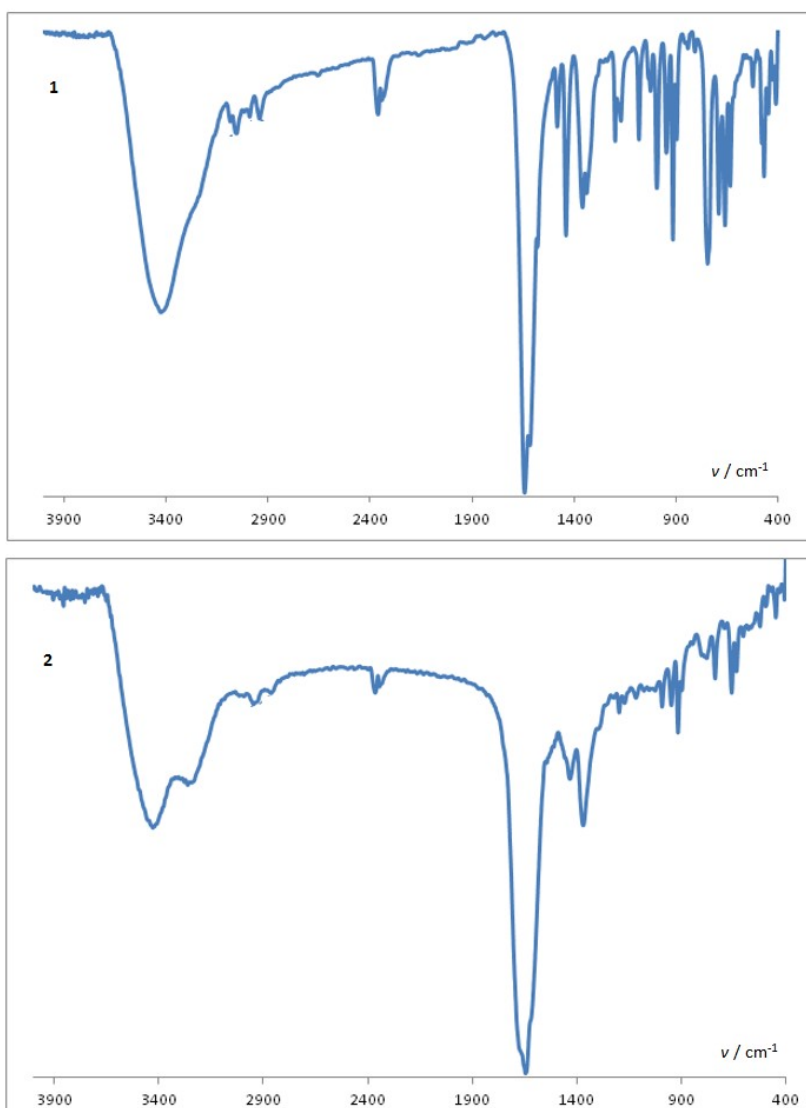

**Figure S16.** FTIR spectra of **1** (top) and **2** (bottom) recorded in KBr.

**Table S1.** Crystal data and structure refinement parameters for the X-ray structures of **1** and **2**.

| <b>Compound</b>                                  | (Ph <sub>4</sub> As) <sub>2</sub> [Mn <sup>IV</sup> (L-6H)]·13.5H <sub>2</sub> O ( <b>1</b> ) | [Na <sub>2</sub> (H <sub>2</sub> O) <sub>3</sub> Mn <sup>IV</sup> (L-6H)] <sub>n</sub> ·4nH <sub>2</sub> O ( <b>2</b> ) |
|--------------------------------------------------|-----------------------------------------------------------------------------------------------|-------------------------------------------------------------------------------------------------------------------------|
| Molecular formula                                | C <sub>60</sub> H <sub>79</sub> As <sub>2</sub> MnN <sub>12</sub> O <sub>19.50</sub>          | C <sub>12</sub> H <sub>26</sub> MnN <sub>12</sub> Na <sub>2</sub> O <sub>13</sub>                                       |
| Formula wt. (g mol <sup>-1</sup> )               | 1485.13                                                                                       | 647.37                                                                                                                  |
| Temperature (K)                                  | 173(2)                                                                                        | 160(2)                                                                                                                  |
| Radiation (λ, Å)                                 | 1.54184                                                                                       | 0.71073                                                                                                                 |
| Crystal system                                   | Orthorhombic                                                                                  | Triclinic                                                                                                               |
| Space group                                      | <i>Pbca</i>                                                                                   | <i>P-1</i>                                                                                                              |
| <i>a</i> (Å)                                     | 21.0876 (3)                                                                                   | 9.9513(7)                                                                                                               |
| <i>b</i> (Å)                                     | 21.1132 (2)                                                                                   | 11.2457(8)                                                                                                              |
| <i>c</i> (Å)                                     | 29.7036 (3)                                                                                   | 11.7458(9)                                                                                                              |
| α (°)                                            | 90.00                                                                                         | 106.127(7)                                                                                                              |
| β (°)                                            | 90.00                                                                                         | 93.290(6)                                                                                                               |
| γ (°)                                            | 90.00                                                                                         | 106.007(6)                                                                                                              |
| Volume (Å <sup>3</sup> )                         | 13224.8 (3)                                                                                   | 1200.93(16)                                                                                                             |
| <i>Z</i>                                         | 8                                                                                             | 2                                                                                                                       |
| ρ <sub>calcd</sub> (mg m <sup>-3</sup> )         | 1.492                                                                                         | 1.790                                                                                                                   |
| μ (mm <sup>-1</sup> )                            | 3.43                                                                                          | 0.68                                                                                                                    |
| Crystal size (mm <sup>3</sup> )                  | 0.14 × 0.13 × 0.12                                                                            | 0.40 × 0.15 × 0.10                                                                                                      |
| Theta range (°)                                  | 3.0 to 61.6                                                                                   | 1.8 to 25.0                                                                                                             |
| Reflections collected                            | 32460                                                                                         | 8613                                                                                                                    |
| Independent reflections                          | 9514 [ <i>R</i> <sub>int</sub> = 0.041]                                                       | 4238 [ <i>R</i> <sub>int</sub> = 0.029]                                                                                 |
| Completeness                                     | 0.927                                                                                         | 1.000                                                                                                                   |
| Goodness-of-fit on <i>F</i> <sup>2</sup>         | 1.03                                                                                          | 1.04                                                                                                                    |
| Final <i>R</i> indices                           | <i>R</i> <sub>1</sub> <sup><i>a</i></sup> = 0.044                                             | <i>R</i> <sub>1</sub> <sup><i>a</i></sup> = 0.036                                                                       |
| [ <i>R</i> > 2σ ( <i>I</i> )]                    | <i>wR</i> <sub>2</sub> <sup><i>b</i></sup> = 0.122                                            | <i>wR</i> <sub>2</sub> <sup><i>b</i></sup> = 0.0824                                                                     |
| <i>R</i> indices (all data)                      | <i>R</i> <sub>1</sub> <sup><i>a</i></sup> = 0.050                                             | <i>R</i> <sub>1</sub> <sup><i>a</i></sup> = 0.0449                                                                      |
|                                                  | <i>wR</i> <sub>2</sub> <sup><i>b</i></sup> = 0.1215                                           | <i>wR</i> <sub>2</sub> <sup><i>b</i></sup> = 0.087                                                                      |
| Largest diff. peak and hole (e Å <sup>-3</sup> ) | 0.59 and -0.51                                                                                | 0.49 and -0.39                                                                                                          |

<sup>[a]</sup> $R_1 = \frac{\sum ||F_o| - |F_c||}{\sum |F_o|}$ . <sup>[b]</sup> $wR_2 = \left\{ \frac{\sum [w(F_o^2 - F_c^2)^2]}{\sum [w(F_o^2)^2]} \right\}^{1/2}$ . <sup>[c]</sup>GOF =  $\left\{ \frac{\sum [w(F_o^2 - F_c^2)^2]}{(n - p)} \right\}^{1/2}$ , where *n* is the number of reflections and *p* is the total number of parameters refined.

**Table S2:** Bond lengths (Å) and angles (°) for **1**.

|           |           |           |           |
|-----------|-----------|-----------|-----------|
| C101—C102 | 1.393 (4) | C232—C233 | 1.385 (5) |
| C101—C106 | 1.385 (5) | C233—H233 | 0.9500    |
| C101—As1  | 1.908 (3) | C233—C234 | 1.372 (6) |
| C102—H102 | 0.9500    | C234—H234 | 0.9500    |
| C102—C103 | 1.388 (5) | C234—C235 | 1.372 (6) |
| C103—H103 | 0.9500    | C235—H235 | 0.9500    |
| C103—C104 | 1.388 (5) | C235—C236 | 1.390 (5) |
| C104—H104 | 0.9500    | C236—H236 | 0.9500    |
| C104—C105 | 1.387 (5) | C1—C2     | 1.529 (4) |
| C105—H105 | 0.9500    | C1—N2     | 1.340 (4) |
| C105—C106 | 1.388 (5) | C1—O1     | 1.233 (4) |
| C106—H106 | 0.9500    | C2—N3     | 1.355 (4) |
| C111—C112 | 1.400 (5) | C2—O2     | 1.227 (4) |
| C111—C116 | 1.390 (5) | C3—C4     | 1.523 (4) |
| C111—As1  | 1.915 (3) | C3—N6     | 1.335 (4) |
| C112—H112 | 0.9500    | C3—O3     | 1.234 (4) |
| C112—C113 | 1.392 (5) | C4—N7     | 1.345 (4) |
| C113—H113 | 0.9500    | C4—O4     | 1.234 (4) |
| C113—C114 | 1.375 (6) | C5—C6     | 1.518 (4) |
| C114—H114 | 0.9500    | C5—N10    | 1.328 (4) |
| C114—C115 | 1.387 (6) | C5—O5     | 1.245 (4) |
| C115—H115 | 0.9500    | C6—N11    | 1.334 (4) |
| C115—C116 | 1.390 (5) | C6—O6     | 1.237 (4) |
| C116—H116 | 0.9500    | C7—H7A    | 0.9900    |
| C121—C122 | 1.391 (5) | C7—H7B    | 0.9900    |
| C121—C126 | 1.389 (5) | C7—N1     | 1.464 (5) |
| C121—As1  | 1.903 (3) | C7—N5     | 1.469 (5) |
| C122—H122 | 0.9500    | C8—H8A    | 0.9900    |
| C122—C123 | 1.389 (5) | C8—H8B    | 0.9900    |
| C123—H123 | 0.9500    | C8—N5     | 1.478 (5) |
| C123—C124 | 1.387 (5) | C8—N9     | 1.445 (5) |
| C124—H124 | 0.9500    | C9—H9A    | 0.9900    |
| C124—C125 | 1.383 (6) | C9—H9B    | 0.9900    |
| C125—H125 | 0.9500    | C9—N1     | 1.435 (5) |
| C125—C126 | 1.383 (5) | C9—N9     | 1.470 (4) |
| C126—H126 | 0.9500    | C10—H10A  | 0.9900    |
| C131—C132 | 1.402 (5) | C10—H10B  | 0.9900    |
| C131—C136 | 1.400 (5) | C10—N4    | 1.458 (4) |
| C131—As1  | 1.903 (3) | C10—N8    | 1.469 (5) |
| C132—H132 | 0.9500    | C11—H11A  | 0.9900    |
| C132—C133 | 1.379 (5) | C11—H11B  | 0.9900    |

|           |           |           |           |
|-----------|-----------|-----------|-----------|
| C133—H133 | 0.9500    | C11—N4    | 1.461 (5) |
| C133—C134 | 1.381 (5) | C11—N12   | 1.462 (5) |
| C134—H134 | 0.9500    | C12—H12A  | 0.9900    |
| C134—C135 | 1.381 (5) | C12—H12B  | 0.9900    |
| C135—H135 | 0.9500    | C12—N8    | 1.453 (5) |
| C135—C136 | 1.395 (5) | C12—N12   | 1.481 (5) |
| C136—H136 | 0.9500    | N1—N2     | 1.436 (4) |
| C201—C202 | 1.374 (5) | N2—Mn1    | 1.971 (3) |
| C201—C206 | 1.402 (5) | N3—N4     | 1.430 (3) |
| C201—As2  | 1.914 (3) | N3—Mn1    | 1.978 (3) |
| C202—H202 | 0.9500    | N5—N6     | 1.431 (4) |
| C202—C203 | 1.395 (5) | N6—Mn1    | 1.974 (3) |
| C203—H203 | 0.9500    | N7—N8     | 1.430 (3) |
| C203—C204 | 1.382 (7) | N7—Mn1    | 1.971 (3) |
| C204—H204 | 0.9500    | N9—N10    | 1.433 (3) |
| C204—C205 | 1.379 (7) | N10—Mn1   | 1.992 (3) |
| C205—H205 | 0.9500    | N11—N12   | 1.434 (4) |
| C205—C206 | 1.382 (5) | N11—Mn1   | 1.970 (3) |
| C206—H206 | 0.9500    | O312—H31A | 0.8497    |
| C212—C213 | 1.383 (5) | O312—H31B | 0.8496    |
| C212—C217 | 1.401 (4) | O313—H31C | 0.8495    |
| C212—As2  | 1.900 (3) | O313—H31D | 0.8498    |
| C213—H213 | 0.9500    | O303—H30A | 0.8505    |
| C213—C214 | 1.392 (5) | O303—H30B | 0.8500    |
| C214—H214 | 0.9500    | O309—H30C | 0.8502    |
| C214—C215 | 1.395 (5) | O309—H30D | 0.8501    |
| C215—H215 | 0.9500    | O307—H30E | 0.8505    |
| C215—C216 | 1.368 (5) | O307—H30F | 0.8509    |
| C216—H216 | 0.9500    | O302—H30G | 0.8499    |
| C216—C217 | 1.384 (5) | O302—H30H | 0.8499    |
| C217—H217 | 0.9500    | O310—H31E | 0.8487    |
| C221—C222 | 1.382 (5) | O310—H31F | 0.8497    |
| C221—C226 | 1.402 (4) | O308—H30I | 0.8508    |
| C221—As2  | 1.903 (3) | O308—H30J | 0.8507    |
| C222—H222 | 0.9500    | O301—H30K | 0.8502    |
| C222—C223 | 1.391 (6) | O301—H30L | 0.8494    |
| C223—H223 | 0.9500    | O306—H30M | 0.8503    |
| C223—C224 | 1.377 (5) | O306—H30N | 0.8499    |
| C224—H224 | 0.9500    | O311—H31G | 0.8498    |
| C224—C225 | 1.377 (6) | O311—H31H | 0.8502    |
| C225—H225 | 0.9500    | O304—H30O | 0.8498    |
| C225—C226 | 1.381 (5) | O304—H30P | 0.8494    |
| C226—H226 | 0.9500    | O314—H31I | 0.8500    |



|                |           |                |             |
|----------------|-----------|----------------|-------------|
| C231—C232      | 1.398 (5) | O314—H31J      | 0.8503      |
| C231—C236      | 1.392 (5) | O305—H30Q      | 0.8700      |
| C231—As2       | 1.901 (3) | O305—H30R      | 0.8699      |
| C232—H232      | 0.9500    |                |             |
|                |           |                |             |
| C102—C101—As1  | 117.4 (3) | C232—C233—H233 | 119.5       |
| C106—C101—C102 | 120.7 (3) | C234—C233—C232 | 120.9 (4)   |
| C106—C101—As1  | 121.9 (2) | C234—C233—H233 | 119.5       |
| C101—C102—H102 | 120.2     | C233—C234—H234 | 120.0       |
| C103—C102—C101 | 119.5 (3) | C235—C234—C233 | 120.0 (3)   |
| C103—C102—H102 | 120.2     | C235—C234—H234 | 120.0       |
| C102—C103—H103 | 120.2     | C234—C235—H235 | 119.8       |
| C104—C103—C102 | 119.7 (3) | C234—C235—C236 | 120.4 (4)   |
| C104—C103—H103 | 120.2     | C236—C235—H235 | 119.8       |
| C103—C104—H104 | 119.7     | C231—C236—H236 | 120.1       |
| C105—C104—C103 | 120.6 (3) | C235—C236—C231 | 119.7 (3)   |
| C105—C104—H104 | 119.7     | C235—C236—H236 | 120.1       |
| C104—C105—H105 | 120.1     | C212—As2—C201  | 112.76 (15) |
| C104—C105—C106 | 119.9 (3) | C212—As2—C221  | 108.99 (14) |
| C106—C105—H105 | 120.1     | C212—As2—C231  | 106.77 (14) |
| C101—C106—C105 | 119.6 (3) | C221—As2—C201  | 106.48 (14) |
| C101—C106—H106 | 120.2     | C231—As2—C201  | 109.92 (13) |
| C105—C106—H106 | 120.2     | C231—As2—C221  | 112.01 (15) |
| C112—C111—As1  | 118.6 (3) | N2—C1—C2       | 110.6 (2)   |
| C116—C111—C112 | 120.7 (3) | O1—C1—C2       | 121.9 (3)   |
| C116—C111—As1  | 120.7 (3) | O1—C1—N2       | 127.4 (3)   |
| C111—C112—H112 | 120.4     | N3—C2—C1       | 109.7 (2)   |
| C113—C112—C111 | 119.2 (4) | O2—C2—C1       | 121.9 (3)   |
| C113—C112—H112 | 120.4     | O2—C2—N3       | 128.3 (3)   |
| C112—C113—H113 | 120.0     | N6—C3—C4       | 110.4 (3)   |
| C114—C113—C112 | 120.1 (4) | O3—C3—C4       | 121.1 (3)   |
| C114—C113—H113 | 120.0     | O3—C3—N6       | 128.4 (3)   |
| C113—C114—H114 | 119.6     | N7—C4—C3       | 110.4 (3)   |
| C113—C114—C115 | 120.7 (3) | O4—C4—C3       | 121.7 (3)   |
| C115—C114—H114 | 119.6     | O4—C4—N7       | 127.9 (3)   |
| C114—C115—H115 | 119.9     | N10—C5—C6      | 110.9 (3)   |
| C114—C115—C116 | 120.2 (4) | O5—C5—C6       | 121.4 (3)   |
| C116—C115—H115 | 119.9     | O5—C5—N10      | 127.7 (3)   |
| C111—C116—C115 | 119.1 (4) | N11—C6—C5      | 110.4 (3)   |
| C111—C116—H116 | 120.4     | O6—C6—C5       | 121.9 (3)   |
| C115—C116—H116 | 120.4     | O6—C6—N11      | 127.6 (3)   |
| C122—C121—As1  | 118.8 (2) | H7A—C7—H7B     | 107.6       |
| C126—C121—C122 | 121.0 (3) | N1—C7—H7A      | 108.7       |

|                |             |               |             |
|----------------|-------------|---------------|-------------|
| C126—C121—As1  | 120.1 (3)   | N1—C7—H7B     | 108.7       |
| C121—C122—H122 | 120.4       | N1—C7—N5      | 114.3 (3)   |
| C123—C122—C121 | 119.3 (3)   | N5—C7—H7A     | 108.7       |
| C123—C122—H122 | 120.4       | N5—C7—H7B     | 108.7       |
| C122—C123—H123 | 120.2       | H8A—C8—H8B    | 107.5       |
| C124—C123—C122 | 119.6 (4)   | N5—C8—H8A     | 108.5       |
| C124—C123—H123 | 120.2       | N5—C8—H8B     | 108.5       |
| C123—C124—H124 | 119.7       | N9—C8—H8A     | 108.5       |
| C125—C124—C123 | 120.7 (3)   | N9—C8—H8B     | 108.5       |
| C125—C124—H124 | 119.7       | N9—C8—N5      | 115.1 (3)   |
| C124—C125—H125 | 119.9       | H9A—C9—H9B    | 107.5       |
| C124—C125—C126 | 120.2 (3)   | N1—C9—H9A     | 108.5       |
| C126—C125—H125 | 119.9       | N1—C9—H9B     | 108.5       |
| C121—C126—H126 | 120.4       | N1—C9—N9      | 115.2 (3)   |
| C125—C126—C121 | 119.2 (4)   | N9—C9—H9A     | 108.5       |
| C125—C126—H126 | 120.4       | N9—C9—H9B     | 108.5       |
| C132—C131—As1  | 119.7 (3)   | H10A—C10—H10B | 107.6       |
| C136—C131—C132 | 120.6 (3)   | N4—C10—H10A   | 108.7       |
| C136—C131—As1  | 119.6 (2)   | N4—C10—H10B   | 108.7       |
| C131—C132—H132 | 120.6       | N4—C10—N8     | 114.4 (3)   |
| C133—C132—C131 | 118.8 (3)   | N8—C10—H10A   | 108.7       |
| C133—C132—H132 | 120.6       | N8—C10—H10B   | 108.7       |
| C132—C133—H133 | 119.5       | H11A—C11—H11B | 107.6       |
| C132—C133—C134 | 120.9 (3)   | N4—C11—H11A   | 108.6       |
| C134—C133—H133 | 119.5       | N4—C11—H11B   | 108.6       |
| C133—C134—H134 | 119.7       | N4—C11—N12    | 114.7 (3)   |
| C135—C134—C133 | 120.7 (3)   | N12—C11—H11A  | 108.6       |
| C135—C134—H134 | 119.7       | N12—C11—H11B  | 108.6       |
| C134—C135—H135 | 120.1       | H12A—C12—H12B | 107.6       |
| C134—C135—C136 | 119.8 (3)   | N8—C12—H12A   | 108.6       |
| C136—C135—H135 | 120.1       | N8—C12—H12B   | 108.6       |
| C131—C136—H136 | 120.4       | N8—C12—N12    | 114.6 (3)   |
| C135—C136—C131 | 119.1 (3)   | N12—C12—H12A  | 108.6       |
| C135—C136—H136 | 120.4       | N12—C12—H12B  | 108.6       |
| C101—As1—C111  | 107.98 (14) | C9—N1—C7      | 109.6 (3)   |
| C121—As1—C101  | 109.23 (14) | C9—N1—N2      | 110.8 (3)   |
| C121—As1—C111  | 109.76 (15) | N2—N1—C7      | 109.4 (3)   |
| C121—As1—C131  | 109.11 (14) | C1—N2—N1      | 114.9 (2)   |
| C131—As1—C101  | 109.90 (14) | C1—N2—Mn1     | 118.0 (2)   |
| C131—As1—C111  | 110.83 (13) | N1—N2—Mn1     | 121.50 (19) |
| C202—C201—C206 | 120.8 (3)   | C2—N3—N4      | 114.3 (2)   |
| C202—C201—As2  | 122.9 (3)   | C2—N3—Mn1     | 116.9 (2)   |
| C206—C201—As2  | 116.3 (3)   | N4—N3—Mn1     | 120.79 (19) |

|                |           |                |             |
|----------------|-----------|----------------|-------------|
| C201—C202—H202 | 120.3     | C10—N4—C11     | 109.7 (3)   |
| C201—C202—C203 | 119.4 (4) | N3—N4—C10      | 111.2 (2)   |
| C203—C202—H202 | 120.3     | N3—N4—C11      | 108.9 (3)   |
| C202—C203—H203 | 120.1     | C7—N5—C8       | 109.4 (3)   |
| C204—C203—C202 | 119.8 (4) | N6—N5—C7       | 109.7 (2)   |
| C204—C203—H203 | 120.1     | N6—N5—C8       | 109.1 (3)   |
| C203—C204—H204 | 119.6     | C3—N6—N5       | 115.7 (2)   |
| C205—C204—C203 | 120.8 (4) | C3—N6—Mn1      | 118.4 (2)   |
| C205—C204—H204 | 119.6     | N5—N6—Mn1      | 121.6 (2)   |
| C204—C205—H205 | 120.0     | C4—N7—N8       | 113.7 (3)   |
| C204—C205—C206 | 120.0 (4) | C4—N7—Mn1      | 117.1 (2)   |
| C206—C205—H205 | 120.0     | N8—N7—Mn1      | 121.20 (19) |
| C201—C206—H206 | 120.4     | C12—N8—C10     | 109.7 (3)   |
| C205—C206—C201 | 119.2 (4) | N7—N8—C10      | 109.1 (2)   |
| C205—C206—H206 | 120.4     | N7—N8—C12      | 110.6 (3)   |
| C213—C212—C217 | 120.7 (3) | C8—N9—C9       | 109.2 (3)   |
| C213—C212—As2  | 119.7 (2) | N10—N9—C8      | 110.6 (3)   |
| C217—C212—As2  | 119.4 (3) | N10—N9—C9      | 108.9 (2)   |
| C212—C213—H213 | 120.2     | C5—N10—N9      | 115.0 (3)   |
| C212—C213—C214 | 119.5 (3) | C5—N10—Mn1     | 117.2 (2)   |
| C214—C213—H213 | 120.2     | N9—N10—Mn1     | 121.2 (2)   |
| C213—C214—H214 | 120.3     | C6—N11—N12     | 115.2 (3)   |
| C213—C214—C215 | 119.5 (4) | C6—N11—Mn1     | 118.4 (2)   |
| C215—C214—H214 | 120.3     | N12—N11—Mn1    | 121.1 (2)   |
| C214—C215—H215 | 119.7     | C11—N12—C12    | 109.5 (3)   |
| C216—C215—C214 | 120.7 (3) | N11—N12—C11    | 110.2 (3)   |
| C216—C215—H215 | 119.7     | N11—N12—C12    | 108.8 (2)   |
| C215—C216—H216 | 119.7     | N2—Mn1—N3      | 79.29 (11)  |
| C215—C216—C217 | 120.6 (3) | N2—Mn1—N6      | 87.24 (11)  |
| C217—C216—H216 | 119.7     | N2—Mn1—N10     | 85.84 (11)  |
| C212—C217—H217 | 120.5     | N3—Mn1—N10     | 153.74 (12) |
| C216—C217—C212 | 119.0 (3) | N6—Mn1—N3      | 113.00 (13) |
| C216—C217—H217 | 120.5     | N6—Mn1—N10     | 87.51 (12)  |
| C222—C221—C226 | 120.0 (3) | N7—Mn1—N2      | 155.17 (13) |
| C222—C221—As2  | 121.7 (2) | N7—Mn1—N3      | 87.20 (11)  |
| C226—C221—As2  | 118.3 (3) | N7—Mn1—N6      | 78.94 (11)  |
| C221—C222—H222 | 120.3     | N7—Mn1—N10     | 113.75 (12) |
| C221—C222—C223 | 119.5 (3) | N11—Mn1—N2     | 112.00 (12) |
| C223—C222—H222 | 120.3     | N11—Mn1—N3     | 87.12 (12)  |
| C222—C223—H223 | 119.8     | N11—Mn1—N6     | 154.98 (12) |
| C224—C223—C222 | 120.3 (4) | N11—Mn1—N7     | 87.76 (12)  |
| C224—C223—H223 | 119.8     | N11—Mn1—N10    | 78.51 (11)  |
| C223—C224—H224 | 119.9     | H31A—O312—H31B | 109.5       |

|                |           |                |       |
|----------------|-----------|----------------|-------|
| C225—C224—C223 | 120.3 (4) | H31C—O313—H31D | 109.5 |
| C225—C224—H224 | 119.9     | H30A—O303—H30B | 109.4 |
| C224—C225—H225 | 119.8     | H30C—O309—H30D | 109.4 |
| C224—C225—C226 | 120.3 (3) | H30E—O307—H30F | 109.4 |
| C226—C225—H225 | 119.8     | H30G—O302—H30H | 109.5 |
| C221—C226—H226 | 120.2     | H31E—O310—H31F | 109.5 |
| C225—C226—C221 | 119.5 (3) | H30I—O308—H30J | 109.4 |
| C225—C226—H226 | 120.2     | H30K—O301—H30L | 109.6 |
| C232—C231—As2  | 121.4 (3) | H30M—O306—H30N | 109.5 |
| C236—C231—C232 | 119.6 (3) | H31G—O311—H31H | 109.5 |
| C236—C231—As2  | 119.0 (3) | H30O—O304—H30P | 109.5 |
| C231—C232—H232 | 120.4     | H31I—O314—H31J | 109.5 |
| C233—C232—C231 | 119.3 (4) | H30Q—O305—H30R | 109.5 |
| C233—C232—H232 | 120.4     |                |       |

**Table S3:** Bond lengths (Å) and angles (°) for **2**.

|                       |             |          |           |
|-----------------------|-------------|----------|-----------|
| Mn1—N6                | 1.9708 (19) | O7W—H7O  | 0.8513    |
| Mn1—N5                | 1.971 (2)   | O7W—H7P  | 0.8505    |
| Mn1—N3                | 1.977 (2)   | N1—C1    | 1.343 (3) |
| Mn1—N4                | 1.978 (2)   | N1—N7    | 1.421 (3) |
| Mn1—N2                | 1.9829 (19) | N2—C2    | 1.333 (3) |
| Mn1—N1                | 1.9831 (19) | N2—N8    | 1.426 (3) |
| Na1—O3 <sup>i</sup>   | 2.3327 (19) | N3—C3    | 1.349 (3) |
| Na1—O4W               | 2.354 (2)   | N3—N9    | 1.422 (3) |
| Na1—O6 <sup>ii</sup>  | 2.4091 (19) | N4—C4    | 1.345 (3) |
| Na1—O5W               | 2.436 (2)   | N4—N10   | 1.423 (3) |
| Na1—O2                | 2.526 (2)   | N5—C5    | 1.348 (3) |
| Na1—N12 <sup>ii</sup> | 2.837 (2)   | N5—N11   | 1.425 (3) |
| Na1—O1                | 2.875 (2)   | N6—C6    | 1.338 (3) |
| Na2—O1                | 2.2755 (19) | N6—N12   | 1.434 (3) |
| Na2—O6W               | 2.381 (2)   | N7—C7    | 1.460 (3) |
| Na2—O4 <sup>i</sup>   | 2.421 (2)   | N7—C11   | 1.484 (3) |
| Na2—O6 <sup>ii</sup>  | 2.4348 (19) | N8—C12   | 1.465 (3) |
| Na2—O5 <sup>ii</sup>  | 2.4832 (18) | N8—C8    | 1.474 (3) |
| Na2—O1 <sup>iii</sup> | 2.609 (2)   | N9—C9    | 1.464 (3) |
| Na2—C6 <sup>ii</sup>  | 2.952 (3)   | N9—C7    | 1.493 (3) |
| Na2—C5 <sup>ii</sup>  | 3.058 (3)   | N10—C8   | 1.469 (3) |
|                       |             | N10—C10  | 1.478 (3) |
|                       |             | N11—C11  | 1.465 (3) |
| O1—C1                 | 1.240 (3)   | N11—C9   | 1.475 (3) |
| O2—C2                 | 1.243 (3)   | N12—C10  | 1.468 (3) |
| O3—C3                 | 1.231 (3)   | N12—C12  | 1.481 (3) |
| O4—C4                 | 1.235 (3)   | C1—C2    | 1.508 (3) |
| O5—C5                 | 1.236 (3)   | C3—C4    | 1.522 (3) |
| O6—C6                 | 1.237 (3)   | C5—C6    | 1.529 (3) |
| O1W—H1O               | 0.8513      | C7—H7A   | 0.9700    |
| O1W—H1P               | 0.8506      | C7—H7B   | 0.9700    |
| O2W—H2O               | 0.8225      | C8—H8A   | 0.9700    |
| O2W—H2P               | 0.8521      | C8—H8B   | 0.9700    |
| O3W—H3O               | 0.8511      | C9—H9A   | 0.9700    |
| O3W—H3P               | 0.8512      | C9—H9B   | 0.9700    |
| O4W—H4O               | 0.8513      | C10—H10A | 0.9700    |
| O4W—H4P               | 0.8505      | C10—H10B | 0.9700    |
| O5W—H5O               | 0.8500      | C11—H11A | 0.9700    |
| O5W—H5P               | 0.8499      | C11—H11B | 0.9700    |
| O6W—H6O               | 0.8500      | C12—H12A | 0.9700    |
| O6W—H6P               | 0.8743      | C12—H12B | 0.9700    |

|                                         |            |                           |             |
|-----------------------------------------|------------|---------------------------|-------------|
|                                         |            |                           |             |
| N6—Mn1—N5                               | 80.37 (8)  | C5—N5—N11                 | 114.7 (2)   |
| N6—Mn1—N3                               | 109.71 (8) | C5—N5—Mn1                 | 116.93 (16) |
| N5—Mn1—N3                               | 87.78 (8)  | N11—N5—Mn1                | 121.23 (15) |
| N6—Mn1—N4                               | 87.41 (8)  | C6—N6—N12                 | 114.2 (2)   |
| N5—Mn1—N4                               | 158.42 (8) | C6—N6—Mn1                 | 116.47 (16) |
| N3—Mn1—N4                               | 79.64 (8)  | N12—N6—Mn1                | 121.76 (15) |
| N6—Mn1—N2                               | 86.82 (8)  | N1—N7—C7                  | 110.40 (18) |
| N5—Mn1—N2                               | 110.04 (8) | N1—N7—C11                 | 109.28 (18) |
| N3—Mn1—N2                               | 157.88 (9) | C7—N7—C11                 | 109.71 (18) |
| N4—Mn1—N2                               | 86.76 (8)  | N2—N8—C12                 | 110.03 (19) |
| N6—Mn1—N1                               | 157.67 (8) | N2—N8—C8                  | 109.42 (18) |
| N5—Mn1—N1                               | 86.94 (8)  | C12—N8—C8                 | 109.74 (18) |
| N3—Mn1—N1                               | 87.90 (8)  | N3—N9—C9                  | 111.09 (19) |
| N4—Mn1—N1                               | 109.84 (8) | N3—N9—C7                  | 109.37 (17) |
| N2—Mn1—N1                               | 80.35 (8)  | C9—N9—C7                  | 109.77 (19) |
| O3 <sup>i</sup> —Na1—O4 <sup>W</sup>    | 174.43 (8) | N4—N10—C8                 | 110.91 (17) |
| O3 <sup>i</sup> —Na1—O6 <sup>ii</sup>   | 80.26 (6)  | N4—N10—C10                | 109.49 (18) |
| O4 <sup>W</sup> —Na1—O6 <sup>ii</sup>   | 99.01 (7)  | C8—N10—C10                | 109.51 (19) |
| O3 <sup>i</sup> —Na1—O5 <sup>W</sup>    | 78.70 (7)  | N5—N11—C11                | 111.33 (18) |
| O4 <sup>W</sup> —Na1—O5 <sup>W</sup>    | 98.72 (7)  | N5—N11—C9                 | 108.89 (17) |
| O6 <sup>ii</sup> —Na1—O5 <sup>W</sup>   | 139.97 (8) | C11—N11—C9                | 109.26 (19) |
| O3 <sup>i</sup> —Na1—O2                 | 101.75 (7) | N6—N12—C10                | 109.94 (18) |
| O4 <sup>W</sup> —Na1—O2                 | 83.13 (7)  | N6—N12—C12                | 108.86 (17) |
| O6 <sup>ii</sup> —Na1—O2                | 127.24 (7) | C10—N12—C12               | 109.82 (19) |
| O5 <sup>W</sup> —Na1—O2                 | 90.36 (7)  | N6—N12—Na1 <sup>iv</sup>  | 104.92 (13) |
| O3 <sup>i</sup> —Na1—N12 <sup>ii</sup>  | 81.75 (6)  | C10—N12—Na1 <sup>iv</sup> | 115.41 (13) |
| O4 <sup>W</sup> —Na1—N12 <sup>ii</sup>  | 93.02 (7)  | C12—N12—Na1 <sup>iv</sup> | 107.63 (14) |
| O6 <sup>ii</sup> —Na1—N12 <sup>ii</sup> | 61.78 (6)  | O1—C1—N1                  | 128.6 (2)   |
| O5 <sup>W</sup> —Na1—N12 <sup>ii</sup>  | 81.71 (7)  | O1—C1—C2                  | 120.4 (2)   |
| O2—Na1—N12 <sup>ii</sup>                | 170.58 (7) | N1—C1—C2                  | 110.96 (19) |
| O3 <sup>i</sup> —Na1—O1                 | 72.84 (6)  | O2—C2—N2                  | 128.8 (2)   |
| O4 <sup>W</sup> —Na1—O1                 | 112.11 (7) | O2—C2—C1                  | 119.7 (2)   |
| O6 <sup>ii</sup> —Na1—O1                | 68.58 (6)  | N2—C2—C1                  | 111.5 (2)   |
| O5 <sup>W</sup> —Na1—O1                 | 134.29 (6) | O3—C3—N3                  | 127.2 (2)   |
| O2—Na1—O1                               | 62.25 (6)  | O3—C3—C4                  | 121.6 (2)   |
| N12 <sup>ii</sup> —Na1—O1               | 127.11 (6) | N3—C3—C4                  | 111.2 (2)   |
| O1—Na2—O6 <sup>W</sup>                  | 127.21 (8) | O4—C4—N4                  | 127.7 (2)   |
| O1—Na2—O4 <sup>i</sup>                  | 117.20 (7) | O4—C4—C3                  | 121.8 (2)   |
| O6 <sup>W</sup> —Na2—O4 <sup>i</sup>    | 86.52 (7)  | N4—C4—C3                  | 110.5 (2)   |
| O1—Na2—O6 <sup>ii</sup>                 | 79.11 (6)  | O5—C5—N5                  | 128.5 (2)   |
| O6 <sup>W</sup> —Na2—O6 <sup>ii</sup>   | 151.13 (7) | O5—C5—C6                  | 121.0 (2)   |
| O4 <sup>i</sup> —Na2—O6 <sup>ii</sup>   | 90.99 (7)  | N5—C5—C6                  | 110.5 (2)   |

|                                         |             |                         |             |
|-----------------------------------------|-------------|-------------------------|-------------|
| O1—Na2—O5 <sup>ii</sup>                 | 145.95 (7)  | O5—C5—Na2 <sup>iv</sup> | 51.45 (12)  |
| O6W—Na2—O5 <sup>ii</sup>                | 81.50 (7)   | N5—C5—Na2 <sup>iv</sup> | 166.21 (16) |
| O4 <sup>i</sup> —Na2—O5 <sup>ii</sup>   | 77.92 (6)   | C6—C5—Na2 <sup>iv</sup> | 71.45 (12)  |
| O6 <sup>ii</sup> —Na2—O5 <sup>ii</sup>  | 69.88 (6)   | O6—C6—N6                | 128.0 (2)   |
| O1—Na2—O1 <sup>iii</sup>                | 79.63 (6)   | O6—C6—C5                | 120.2 (2)   |
| O6W—Na2—O1 <sup>iii</sup>               | 89.13 (7)   | N6—C6—C5                | 111.8 (2)   |
| O4 <sup>i</sup> —Na2—O1 <sup>iii</sup>  | 161.31 (7)  | O6—C6—Na2 <sup>iv</sup> | 53.79 (12)  |
| O6 <sup>ii</sup> —Na2—O1 <sup>iii</sup> | 84.10 (6)   | N6—C6—Na2 <sup>iv</sup> | 143.49 (15) |
| O5 <sup>ii</sup> —Na2—O1 <sup>iii</sup> | 83.46 (6)   | C5—C6—Na2 <sup>iv</sup> | 79.13 (13)  |
| C1—O1—Na2                               | 128.84 (16) | N7—C7—N9                | 113.91 (19) |
| C1—O1—Na2 <sup>iii</sup>                | 125.01 (15) | N7—C7—H7A               | 108.8       |
| Na2—O1—Na2 <sup>iii</sup>               | 100.37 (6)  | N9—C7—H7A               | 108.8       |
| C1—O1—Na1                               | 91.83 (15)  | N7—C7—H7B               | 108.8       |
| Na2—O1—Na1                              | 96.01 (6)   | N9—C7—H7B               | 108.8       |
| Na2 <sup>iii</sup> —O1—Na1              | 107.56 (6)  | H7A—C7—H7B              | 107.7       |
| C2—O2—Na1                               | 110.34 (15) | N10—C8—N8               | 114.0 (2)   |
| C3—O3—Na1 <sup>i</sup>                  | 154.87 (17) | N10—C8—H8A              | 108.7       |
| C4—O4—Na2 <sup>i</sup>                  | 131.46 (17) | N8—C8—H8A               | 108.7       |
| C5—O5—Na2 <sup>iv</sup>                 | 105.64 (15) | N10—C8—H8B              | 108.7       |
| C6—O6—Na1 <sup>iv</sup>                 | 121.42 (16) | N8—C8—H8B               | 108.7       |
| C6—O6—Na2 <sup>iv</sup>                 | 102.02 (14) | H8A—C8—H8B              | 107.6       |
| Na1 <sup>iv</sup> —O6—Na2 <sup>iv</sup> | 105.23 (7)  | N9—C9—N11               | 114.36 (19) |
| H1O—O1W—H1P                             | 109.4       | N9—C9—H9A               | 108.7       |
| H2O—O2W—H2P                             | 107.7       | N11—C9—H9A              | 108.7       |
| H3O—O3W—H3P                             | 109.5       | N9—C9—H9B               | 108.7       |
| Na1—O4W—H4O                             | 125.4       | N11—C9—H9B              | 108.7       |
| Na1—O4W—H4P                             | 122.8       | H9A—C9—H9B              | 107.6       |
| H4O—O4W—H4P                             | 109.5       | N12—C10—N10             | 114.28 (18) |
| Na1—O5W—H5O                             | 115.6       | N12—C10—H10A            | 108.7       |
| Na1—O5W—H5P                             | 101.4       | N10—C10—H10A            | 108.7       |
| H5O—O5W—H5P                             | 115.7       | N12—C10—H10B            | 108.7       |
| Na2—O6W—H6O                             | 97.4        | N10—C10—H10B            | 108.7       |
| Na2—O6W—H6P                             | 110.6       | H10A—C10—H10B           | 107.6       |
| H6O—O6W—H6P                             | 97.9        | N11—C11—N7              | 114.06 (19) |
| H7O—O7W—H7P                             | 109.4       | N11—C11—H11A            | 108.7       |
| C1—N1—N7                                | 114.95 (18) | N7—C11—H11A             | 108.7       |
| C1—N1—Mn1                               | 114.72 (16) | N11—C11—H11B            | 108.7       |
| N7—N1—Mn1                               | 121.24 (14) | N7—C11—H11B             | 108.7       |
| C2—N2—N8                                | 115.38 (19) | H11A—C11—H11B           | 107.6       |
| C2—N2—Mn1                               | 115.33 (16) | N8—C12—N12              | 114.35 (19) |
| N8—N2—Mn1                               | 121.76 (13) | N8—C12—H12A             | 108.7       |
| C3—N3—N9                                | 114.3 (2)   | N12—C12—H12A            | 108.7       |
| C3—N3—Mn1                               | 116.53 (16) | N8—C12—H12B             | 108.7       |

|                              |              |                                            |              |
|------------------------------|--------------|--------------------------------------------|--------------|
| N9—N3—Mn1                    | 120.13 (14)  | N12—C12—H12B                               | 108.7        |
| C4—N4—N10                    | 114.25 (19)  | H12A—C12—H12B                              | 107.6        |
| C4—N4—Mn1                    | 117.54 (16)  | N10—N4—Mn1                                 | 121.21 (15)  |
|                              |              |                                            |              |
| C1—N1—N7—C7                  | -155.9 (2)   | O3—C3—C4—O4                                | 23.3 (4)     |
| Mn1—N1—N7—C7                 | 58.8 (2)     | N3—C3—C4—O4                                | -157.0 (2)   |
| C1—N1—N7—C11                 | 83.4 (2)     | O3—C3—C4—N4                                | -156.2 (2)   |
| Mn1—N1—N7—C11                | -61.9 (2)    | N3—C3—C4—N4                                | 23.4 (3)     |
| C2—N2—N8—C12                 | -152.1 (2)   | Na2 <sup>iv</sup> —O5—C5—N5                | -162.3 (2)   |
| Mn1—N2—N8—C12                | 59.6 (2)     | Na2 <sup>iv</sup> —O5—C5—C6                | 17.5 (2)     |
| C2—N2—N8—C8                  | 87.2 (2)     | N11—N5—C5—O5                               | 12.5 (3)     |
| Mn1—N2—N8—C8                 | -61.0 (2)    | Mn1—N5—C5—O5                               | 163.3 (2)    |
| C3—N3—N9—C9                  | -154.50 (19) | N11—N5—C5—C6                               | -167.42 (18) |
| Mn1—N3—N9—C9                 | 59.5 (2)     | Mn1—N5—C5—C6                               | -16.6 (2)    |
| C3—N3—N9—C7                  | 84.2 (2)     | N11—N5—C5—Na2 <sup>iv</sup>                | -71.8 (8)    |
| Mn1—N3—N9—C7                 | -61.8 (2)    | Mn1—N5—C5—Na2 <sup>iv</sup>                | 79.0 (8)     |
| C4—N4—N10—C8                 | -150.0 (2)   | Na1 <sup>iv</sup> —O6—C6—N6                | 17.4 (3)     |
| Mn1—N4—N10—C8                | 60.0 (2)     | Na2 <sup>iv</sup> —O6—C6—N6                | 133.8 (2)    |
| C4—N4—N10—C10                | 89.0 (2)     | Na1 <sup>iv</sup> —O6—C6—C5                | -162.25 (15) |
| Mn1—N4—N10—C10               | -60.9 (2)    | Na2 <sup>iv</sup> —O6—C6—C5                | -45.8 (2)    |
| C5—N5—N11—C11                | -151.1 (2)   | Na1 <sup>iv</sup> —O6—C6—Na2 <sup>iv</sup> | -116.41 (14) |
| Mn1—N5—N11—C11               | 59.4 (2)     | N12—N6—C6—O6                               | 12.3 (3)     |
| C5—N5—N11—C9                 | 88.3 (2)     | Mn1—N6—C6—O6                               | 162.57 (18)  |
| Mn1—N5—N11—C9                | -61.1 (2)    | N12—N6—C6—C5                               | -168.05 (17) |
| C6—N6—N12—C10                | -152.40 (19) | Mn1—N6—C6—C5                               | -17.8 (2)    |
| Mn1—N6—N12—C10               | 59.0 (2)     | N12—N6—C6—Na2 <sup>iv</sup>                | 90.5 (3)     |
| C6—N6—N12—C12                | 87.3 (2)     | Mn1—N6—C6—Na2 <sup>iv</sup>                | -119.3 (2)   |
| Mn1—N6—N12—C12               | -61.3 (2)    | O5—C5—C6—O6                                | 21.7 (3)     |
| C6—N6—N12—Na1 <sup>iv</sup>  | -27.72 (19)  | N5—C5—C6—O6                                | -158.4 (2)   |
| Mn1—N6—N12—Na1 <sup>iv</sup> | -176.27 (10) | Na2 <sup>iv</sup> —C5—C6—O6                | 36.12 (17)   |
| Na2—O1—C1—N1                 | 24.6 (4)     | O5—C5—C6—N6                                | -158.0 (2)   |
| Na2 <sup>iii</sup> —O1—C1—N1 | -123.2 (2)   | N5—C5—C6—N6                                | 21.9 (3)     |
| Na1—O1—C1—N1                 | 123.8 (3)    | Na2 <sup>iv</sup> —C5—C6—N6                | -143.58 (18) |
| Na2—O1—C1—C2                 | -154.72 (17) | O5—C5—C6—Na2 <sup>iv</sup>                 | -14.4 (2)    |
| Na2 <sup>iii</sup> —O1—C1—C2 | 57.5 (3)     | N5—C5—C6—Na2 <sup>iv</sup>                 | 165.51 (17)  |
| Na1—O1—C1—C2                 | -55.5 (2)    | N1—N7—C7—N9                                | -67.5 (2)    |
| N7—N1—C1—O1                  | 8.5 (4)      | C11—N7—C7—N9                               | 53.0 (3)     |
| Mn1—N1—C1—O1                 | 156.0 (2)    | N3—N9—C7—N7                                | 69.3 (3)     |
| N7—N1—C1—C2                  | -172.2 (2)   | C9—N9—C7—N7                                | -52.8 (3)    |
| Mn1—N1—C1—C2                 | -24.6 (3)    | N4—N10—C8—N8                               | -66.9 (3)    |
| Na1—O2—C2—N2                 | -152.4 (2)   | C10—N10—C8—N8                              | 54.0 (3)     |
| Na1—O2—C2—C1                 | 27.0 (3)     | N2—N8—C8—N10                               | 66.8 (2)     |
| N8—N2—C2—O2                  | 7.8 (4)      | C12—N8—C8—N10                              | -54.1 (3)    |



|                            |              |                                |              |
|----------------------------|--------------|--------------------------------|--------------|
| Mn1—N2—C2—O2               | 158.2 (2)    | N3—N9—C9—N11                   | -67.8 (2)    |
| N8—N2—C2—C1                | -171.64 (19) | C7—N9—C9—N11                   | 53.3 (3)     |
| Mn1—N2—C2—C1               | -21.3 (3)    | N5—N11—C9—N9                   | 67.5 (2)     |
| O1—C1—C2—O2                | 29.8 (4)     | C11—N11—C9—N9                  | -54.2 (3)    |
| N1—C1—C2—O2                | -149.7 (2)   | N6—N12—C10—N10                 | -67.1 (2)    |
| O1—C1—C2—N2                | -150.7 (2)   | C12—N12—C10—N10                | 52.7 (3)     |
| N1—C1—C2—N2                | 29.9 (3)     | Na1 <sup>iv</sup> —N12—C10—N10 | 174.56 (14)  |
| Na1 <sup>i</sup> —O3—C3—N3 | 73.8 (5)     | N4—N10—C10—N12                 | 68.2 (2)     |
| Na1 <sup>i</sup> —O3—C3—C4 | -106.6 (4)   | C8—N10—C10—N12                 | -53.6 (3)    |
| N9—N3—C3—O3                | 12.0 (3)     | N5—N11—C11—N7                  | -66.0 (3)    |
| Mn1—N3—C3—O3               | 159.3 (2)    | C9—N11—C11—N7                  | 54.3 (3)     |
| N9—N3—C3—C4                | -167.60 (17) | N1—N7—C11—N11                  | 66.7 (2)     |
| Mn1—N3—C3—C4               | -20.3 (2)    | C7—N7—C11—N11                  | -54.4 (3)    |
| Na2 <sup>i</sup> —O4—C4—N4 | 144.8 (2)    | N2—N8—C12—N12                  | -67.3 (2)    |
| Na2 <sup>i</sup> —O4—C4—C3 | -34.7 (3)    | C8—N8—C12—N12                  | 53.1 (3)     |
| N10—N4—C4—O4               | 12.7 (4)     | N6—N12—C12—N8                  | 67.8 (3)     |
| Mn1—N4—C4—O4               | 163.8 (2)    | C10—N12—C12—N8                 | -52.6 (3)    |
| N10—N4—C4—C3               | -167.81 (19) | Na1 <sup>iv</sup> —N12—C12—N8  | -179.03 (16) |
| Mn1—N4—C4—C3               | -16.7 (2)    |                                |              |

Symmetry codes: (i)  $-x+2, -y+1, -z+1$ ; (ii)  $x+1, y, z$ ; (iii)  $-x+2, -y, -z+1$ ; (iv)  $x-1, y, z$ .

**Table S4:** Hydrogen bonding details of **1** (Å, °).

| <i>D—H···A</i>               | <i>D—H</i> | <i>H···A</i> | <i>D···A</i> | <i>D—H···A</i> |
|------------------------------|------------|--------------|--------------|----------------|
| O312-H···O306 <sup>i</sup>   | 0.85       | 1.99         | 2.823(4)     | 168.2          |
| O312-H···O309                | 0.85       | 2.03         | 2.850(4)     | 163.3          |
| O313-H···N1 <sup>ii</sup>    | 0.85       | 2.58         | 3.071(4)     | 118.1          |
| O313-H···O1 <sup>ii</sup>    | 0.85       | 2.11         | 2.940(3)     | 164.9          |
| O313-H···O312 <sup>iii</sup> | 0.85       | 1.91         | 2.728(4)     | 162.1          |
| O303-H···O3 <sup>iii</sup>   | 0.85       | 2.01         | 2.850(3)     | 170.7          |
| O303-H···O302 <sup>iv</sup>  | 0.85       | 1.91         | 2.718(4)     | 158            |
| O309-H···N12                 | 0.85       | 2.41         | 3.107(4)     | 139.4          |
| O309-H···O6                  | 0.85       | 2.27         | 2.988(3)     | 142.4          |
| O309-H···O308                | 0.85       | 1.87         | 2.717(4)     | 176.5          |
| O307-H···O303 <sup>v</sup>   | 0.85       | 1.91         | 2.742(4)     | 166.8          |
| O307-H···O311 <sup>ii</sup>  | 0.85       | 1.91         | 2.740(3)     | 165.1          |
| O302-H···O310 <sup>i</sup>   | 0.85       | 1.98         | 2.794(4)     | 159.7          |
| O302-H···N8 <sup>iii</sup>   | 0.85       | 2.54         | 3.234(4)     | 140.1          |
| O302-H···O4 <sup>iii</sup>   | 0.85       | 2.18         | 2.940(3)     | 149.5          |
| O310-H···O309                | 0.85       | 1.99         | 2.798(5)     | 157.9          |
| O310-H···O304 <sup>i</sup>   | 0.85       | 2.02         | 2.851(4)     | 167.1          |
| O308-H···O307                | 0.85       | 1.86         | 2.708(4)     | 170.8          |
| O308-H···N9 <sup>ii</sup>    | 0.85       | 2.52         | 3.174(4)     | 134.7          |
| O308-H···O5 <sup>ii</sup>    | 0.85       | 2.19         | 2.957(3)     | 149            |
| O301-H···O303 <sup>vi</sup>  | 0.85       | 2.59         | 3.335(8)     | 146.2          |
| O301-H···O302                | 0.85       | 2.51         | 3.264(9)     | 148.1          |
| O301-H···O314 <sup>vii</sup> | 0.85       | 2.32         | 2.990(9)     | 135.5          |
| O306-H···O305                | 0.85       | 2.04         | 2.810(4)     | 150.6          |
| O306-H···O2                  | 0.85       | 2.04         | 2.888(3)     | 172.3          |
| O311-H···O5                  | 0.85       | 2.16         | 2.959(4)     | 155.4          |
| O311-H···O305 <sup>i</sup>   | 0.85       | 1.94         | 2.782(4)     | 170.7          |
| O304-H···O4 <sup>iii</sup>   | 0.85       | 2.02         | 2.813(3)     | 154.4          |
| O304-H···O6 <sup>i</sup>     | 0.85       | 2.06         | 2.853(4)     | 155.5          |
| O314-H···O5 <sup>iii</sup>   | 0.85       | 2.23         | 2.907(4)     | 136.3          |
| O305-H···O304                | 0.87       | 2.01         | 2.828(4)     | 156.9          |

Symmetry codes: (i)  $-0.5 + x, 1.5 - y, 1 - z$ ; (ii)  $0.5 - x, y + 0.5, z$ ; (iii)  $x, 1.5 - y, 0.5 + z$ ; (iv)  $1 - x, y + 0.5, 1.5 - z$ ; (v)  $1 - x, 2 - y, 1 - z$ ; (vi)  $1 - x, y - 0.5, 1.5 - z$ ; (vii)  $0.5 - x, y - 0.5, z$ .

**Supplementary Table S5:** Hydrogen bonding details of **2** (Å, °).

| $D-H\cdots A$                                        | $D-H$ | $H\cdots A$ | $D\cdots A$ | $D-H\cdots A$ |
|------------------------------------------------------|-------|-------------|-------------|---------------|
| O1 <i>W</i> —H1 <i>O</i> ⋯O3 <i>W</i>                | 0.85  | 1.95        | 2.790 (2)   | 171           |
| O1 <i>W</i> —H1 <i>P</i> ⋯O2 <sup>v</sup>            | 0.85  | 1.89        | 2.703 (2)   | 160           |
| O1 <i>W</i> —H1 <i>P</i> ⋯N8 <sup>v</sup>            | 0.85  | 2.69        | 3.160 (3)   | 116           |
| O2 <i>W</i> —H2 <i>O</i> ⋯O5 <sup>vi</sup>           | 0.82  | 2.03        | 2.839 (3)   | 166           |
| O2 <i>W</i> —H2 <i>O</i> ⋯N11 <sup>vi</sup>          | 0.82  | 2.67        | 3.140 (3)   | 118           |
| O2 <i>W</i> —H2 <i>P</i> ⋯O1 <i>W</i> <sup>v</sup>   | 0.85  | 2.00        | 2.839 (3)   | 168           |
| O3 <i>W</i> —H3 <i>O</i> ⋯O4                         | 0.85  | 2.37        | 3.019 (2)   | 133           |
| O3 <i>W</i> —H3 <i>O</i> ⋯N10                        | 0.85  | 2.08        | 2.865 (3)   | 152           |
| O3 <i>W</i> —H3 <i>P</i> ⋯O6 <i>W</i> <sup>i</sup>   | 0.85  | 1.93        | 2.772 (3)   | 169           |
| O4 <i>W</i> —H4 <i>O</i> ⋯O7 <i>W</i> <sup>ii</sup>  | 0.85  | 1.82        | 2.660 (2)   | 169           |
| O4 <i>W</i> —H4 <i>P</i> ⋯O3 <i>W</i> <sup>v</sup>   | 0.85  | 1.97        | 2.795 (3)   | 164           |
| O5 <i>W</i> —H5 <i>O</i> ⋯O1 <i>W</i>                | 0.85  | 2.14        | 2.875 (3)   | 144           |
| O5 <i>W</i> —H5 <i>P</i> ⋯N9 <sup>i</sup>            | 0.85  | 2.29        | 2.967 (3)   | 137           |
| O6 <i>W</i> —H6 <i>P</i> ⋯O4 <i>W</i> <sup>iii</sup> | 0.87  | 1.96        | 2.789 (3)   | 157           |
| O7 <i>W</i> —H7 <i>O</i> ⋯O2 <i>W</i>                | 0.85  | 1.93        | 2.777 (3)   | 172           |
| O7 <i>W</i> —H7 <i>P</i> ⋯O2 <i>W</i> <sup>vii</sup> | 0.85  | 1.95        | 2.785 (3)   | 169           |

Symmetry codes: (i)  $-x+2, -y+1, -z+1$ ; (ii)  $x+1, y, z$ ; (iii)  $-x+2, -y, -z+1$ ; (v)  $-x+2, -y+1, -z+2$ ; (vi)  $-x+1, -y, -z+1$ ; (vii)  $-x+1, -y, -z+2$ .

**Table S6:** The main geometrical parameters of the coordination sphere for **1**, **2** and  $(\text{Ph}_4\text{As})_2[\text{Fe}(\text{L}-6\text{H})]\cdot 13.28\text{H}_2\text{O}$ .<sup>13</sup>

|                   | <b>1</b> | <b>2</b> | $(\text{Ph}_4\text{As})_2[\text{Fe}(\text{L}-6\text{H})]\cdot 13.28\text{H}_2\text{O}^{13}$ |
|-------------------|----------|----------|---------------------------------------------------------------------------------------------|
| $\varphi, ^\circ$ | 28.0     | 32.3     | 28.0                                                                                        |
| $\alpha, ^\circ$  | 78.91    | 80.12    | 79.23                                                                                       |
| a, Å              | 1.976    | 1.977    | 1.957                                                                                       |
| h, Å              | 2.39     | 2.39     | 2.38                                                                                        |

$\varphi$  – a distortion angle ( $\varphi=0^\circ$  for a trigonal prism and  $\varphi=60^\circ$  for a trigonal antiprism)

$\alpha$  – the bite angle

a – the distance between the encapsulated metal ion and the coordinated nitrogen atom

h – the distance between the coordination polyhedron bases

**Table S7.** Shape analysis of manganese(IV) and sodium geometry in complexes **1** and **2** using SHAPE 2.1 software<sup>14</sup> ( $S_Q(P)$  values)\*

| Complex 1   |                                      |                                         |                                      |                                          |                                                        |
|-------------|--------------------------------------|-----------------------------------------|--------------------------------------|------------------------------------------|--------------------------------------------------------|
| Central ion | Hexagon<br>( $D_{6h}$ )              | Pentagonal<br>pyramid<br>( $C_{5v}$ )   | Octahedron<br>( $O_h$ )              | Trigonal<br>prism ( $D_{3h}$ )           | Johnson<br>pentagonal<br>pyramid J2<br>( $C_{5v}$ )    |
| Mn(1)       | 34.733                               | 19.534                                  | 5.108                                | 3.926                                    | 23.521                                                 |
| Complex 2   |                                      |                                         |                                      |                                          |                                                        |
| Central ion | Hexagon<br>( $D_{6h}$ )              | Pentagonal<br>pyramid<br>( $C_{5v}$ )   | Octahedron<br>( $O_h$ )              | Trigonal<br>prism ( $D_{3h}$ )           | Johnson<br>pentagonal<br>pyramid J2<br>( $C_{5v}$ )    |
| Mn(1)       | 34.367                               | 20.511                                  | 3.863                                | 5.108                                    | 24.450                                                 |
|             | Hexagonal<br>pyramid<br>( $D_{6v}$ ) | Pentagonal<br>bipyramid<br>( $D_{5h}$ ) | Capped<br>octahedron<br>( $C_{3v}$ ) | Capped<br>trigonal<br>prism ( $C_{2v}$ ) | Johnson<br>pentagonal<br>bipyramid<br>J13 ( $D_{5h}$ ) |
| Na(1)       | 22.097                               | 4.100                                   | 4.945                                | 3.571                                    | 6.221                                                  |
|             | Hexagon<br>( $D_{6h}$ )              | Pentagonal<br>pyramid<br>( $C_{5v}$ )   | Octahedron<br>( $O_h$ )              | Trigonal<br>prism ( $D_{3h}$ )           | Johnson<br>pentagonal<br>pyramid J2<br>( $C_{5v}$ )    |
| Na(2)       | 29.120                               | 21.132                                  | 3.434                                | 13.327                                   | 23.256                                                 |

\*  $S_Q(P)$  is a measure of the distortion of the central atom coordination polyhedron from the ideal geometry.<sup>14</sup>  $S_Q(P) = 0$  if the polyhedron indicates the ideal geometry, while distortions from the ideal geometry resulted in higher values of  $S_Q(P)$ .

**Table S8.** XYZ coordinates of the optimized (BP86/TZVP) structure of **1**.

|    |              |              |              |
|----|--------------|--------------|--------------|
| C  | 9.385203135  | 12.581821756 | 12.860576070 |
| C  | 9.550991022  | 14.110927666 | 12.904584280 |
| C  | 10.320769828 | 12.893464300 | 8.159620397  |
| C  | 10.199036562 | 14.427300580 | 8.155071591  |
| C  | 5.770664477  | 12.812281998 | 9.705768082  |
| C  | 5.750979021  | 14.327459485 | 9.973210237  |
| C  | 9.711244506  | 10.466497985 | 10.725285726 |
| H  | 9.732862820  | 9.364980529  | 10.660877638 |
| H  | 10.610055023 | 10.824619862 | 11.239560308 |
| C  | 8.416160875  | 10.608751065 | 8.708479324  |
| H  | 8.393294268  | 11.073050279 | 7.716236985  |
| H  | 8.405467022  | 9.509965109  | 8.605810592  |
| C  | 7.312739159  | 10.470870700 | 10.836526295 |
| H  | 6.442720294  | 10.834605492 | 11.394552322 |
| H  | 7.285613079  | 9.368965635  | 10.781210787 |
| C  | 9.883393277  | 16.542951787 | 10.292871517 |
| H  | 10.888778514 | 16.154293242 | 10.095886258 |
| H  | 9.917222320  | 17.643552188 | 10.366763090 |
| C  | 8.001052279  | 16.451937042 | 11.780716638 |
| H  | 7.992084500  | 17.551008864 | 11.880438529 |
| H  | 7.643173448  | 15.993586058 | 12.709416021 |
| C  | 7.651576189  | 16.613512147 | 9.410703881  |
| H  | 6.998273674  | 16.274557087 | 8.598945884  |
| H  | 7.642678800  | 17.715972867 | 9.460315615  |
| N  | 8.537056161  | 10.838681412 | 11.543686976 |
| N  | 8.579231239  | 12.233010592 | 11.813541649 |
| N  | 9.487704469  | 14.620127934 | 11.638067793 |
| N  | 9.406062046  | 16.037424025 | 11.577790022 |
| N  | 9.691990524  | 10.979841224 | 9.357685974  |
| N  | 9.833351837  | 12.393614924 | 9.334546454  |
| N  | 9.109722408  | 14.807319145 | 8.887519098  |
| N  | 9.026759862  | 16.203728964 | 9.136162694  |
| N  | 7.217221323  | 10.985663783 | 9.453419264  |
| N  | 7.054654908  | 12.396654709 | 9.490849297  |
| N  | 6.911057399  | 14.703631325 | 10.589969141 |
| N  | 7.097090595  | 16.109061844 | 10.685433317 |
| O  | 9.927775538  | 11.828740049 | 13.680116149 |
| O  | 9.713858155  | 14.733622555 | 13.962337281 |
| O  | 10.798400942 | 12.259703582 | 7.209221069  |
| O  | 11.000664357 | 15.158002561 | 7.557960562  |
| O  | 4.742116001  | 12.122953190 | 9.699525645  |
| O  | 4.796666862  | 15.048691028 | 9.653663781  |
| Mn | 8.495581283  | 13.525593433 | 10.292075767 |

## References

1. *CrysAlis PRO*, Agilent Technologies, Version 1.171.37.35 (release 13-08-2014 CrysAlis171.NET)
2. O. V. Dolomanov, L. J. Bourhis, R. J. Gildea, J. A. K. Howard and H. Puschmann. OLEX2: A Complete Structure Solution, Refinement and Analysis Program, *J. Appl. Crystallogr.*, 2009, **42**, 339–341.
3. G. M. Sheldrick, *Acta Crystallogr. Sect. A*, 2015, **71**, 3–8.
4. A. K. Hassan, L. A. Pardi, J. Krzystek, A. Sienkiewicz, P. Goy, M. Rohrer and L. C. Brunel, *J. Magn. Reson.*, 2000, **142**, 300–312.
5. F. Neese, *WIREs Comput. Mol.Sci.*, 2012, **2**, 73-78.
6. A. D. Becke, *J. Chem. Phys.*, 1986, **84**, 4524–4529.
7. S. Grimme, S. Ehrlich and L. Goerigk, *J. Comput. Chem.*, 2011, **32**, 1456–1465.
8. D. Bykov, T. Petrenko, R. Izsák, S. Kossmann, U. Becker, E. Valeev and F. Neese, *Mol. Phys.*, 2015, **113**, 1961–1977.
9. A. D. Becke, *J. Chem. Phys.*, 1993, **98**, 5648–5652.
10. M. Cossi, N. Rega, G. Scalmani and V. Barone, *J. Comput. Chem.*, 2003, **24**, 669–681.
11. F. Neese, *J. Chem. Phys.*, 2005, **122**, 34107.
12. E. F. Pettersen, T. D. Goddard, C. C. Huang, G. S. Couch, D. M. Greenblatt, E. C. Meng and T. E. Ferrin, *J. Comput. Chem.*, 2004, **25**, 1605–1612.
13. S. Tomy, S. I. Shylin, D. Bykov, V. Ksenofontov, E. Gumienna-Kontecka, V. Bon and I. O. Fritsky, *Nat. Commun.*, 2017, **8**, 14099.
14. M. Llunell, D. Casanova, J. Cirera, P. Alemany and S. Alvarez, SHAPE, version 2.1, Universitat de Barcelona, Barcelona, Spain, 2013.
